# Supplementary material for: Effects of an Exercise Program on Cardiometabolic and Mental Health in Children With Overweight or Obesity: A Secondary Analysis of a Randomized Clinical Trial
Source: PubMed Central journal article supplement (PMC10375312; doi:10.1001/jamanetworkopen.2023.24839), 2023-07-27
Supplement: jamanetwopen-e2324839-s001.pdf [file jamanetwopen-e2324839-s001.pdf]

1 **CLINICAL TRIAL PROTOCOL**

2

3 **Effects of an exercise-based randomized controlled trial on cognition,**

4 **brain structure and brain function in overweight preadolescent children**

5 **(ActiveBrains)**

6

**Brief title**

Effects of an exercise program on cognition and brain in overweight/obese preadolescent children

**Organization's Unique Protocol ID**

DEP2013-47540-R

**Study Start**

December 2014

**Study Completion**

July 2017

**Sponsor**

Universidad de Granada

**Principal Investigator**

Francisco B. Ortega Porcel. Professor at the University of Granada, Granada, Spain.

**Principal Collaborators**

Research Institute of Sports and Health (iMUDS), Granada, Spain

Research Center of Brain, Mind and Behavior (CIMCYC), Granada, Spain

*Biomedical Research Centre (CIBM), Granada, Spain*

San Cecilio University Hospital, Granada, Spain

Virgen de las Nieves Hospital, Granada, Spain

**Human Subjects Review**

Approval Number: 848

Board Name: Ethics Committee on Human Research

Board Affiliation: University of Granada

7  
8

|    |                                                                                    |           |
|----|------------------------------------------------------------------------------------|-----------|
| 9  | <b>Table of contents</b>                                                           |           |
| 10 | <b>1. PROTOCOL SUMMARY</b>                                                         | <b>3</b>  |
| 11 | <b>2. BACKGROUND</b>                                                               | <b>3</b>  |
| 12 | 2.1. State of the art and rationale for the primary aim                            | 3         |
| 13 | 2.2. State of the art and rationale for the secondary aims                         | 4         |
| 14 | 2.3. Capacity of the principal investigator to successfully carry out this project | 6         |
| 15 | <b>3. AIMS AND HYPOTHESES</b>                                                      | <b>7</b>  |
| 16 | 3.1. Overall hypothesis                                                            | 7         |
| 17 | 3.2. Overall aim                                                                   | 7         |
| 18 | 3.3. Specific aims                                                                 | 7         |
| 19 | <b>4. METHODOLOGY AND RESEARCH PLAN. TRIAL DESIGN</b>                              | <b>8</b>  |
| 20 | 4.1. Brief description of facilities and equipment                                 | 8         |
| 21 | 4.2. Study sample and design                                                       | 9         |
| 22 | 4.3. Rationale for the age and weight status group selected for the study          | 10        |
| 23 | 4.4. Sample size and power                                                         | 10        |
| 24 | 4.5. Inclusion/exclusion criteria                                                  | 11        |
| 25 | 4.6. Recruitment and randomization                                                 | 11        |
| 26 | 4.7. Intervention                                                                  | 12        |
| 27 | 4.8. Rationale for the exercise program design                                     | 13        |
| 28 | 4.9. Strategies to enhance compliance and adherence to the program                 | 13        |
| 29 | 4.10. Primary outcomes                                                             | 14        |
| 30 | 4.11. Secondary outcomes                                                           | 16        |
| 31 | 4.12. Data analysis plan                                                           | 22        |
| 32 | <b>5. CONTINGENCY AND RISK MANAGEMENT PLANS</b>                                    | <b>23</b> |
| 33 | <b>6. FEASIBILITY AND CREDIBILITY OF THE PROJECT</b>                               | <b>24</b> |
| 34 | <b>7. SCIENTIFIC IMPACT OF THE STUDY</b>                                           | <b>24</b> |
| 35 | 7.1. Scientific impact at a national and international level                       | 24        |
| 36 | 7.2. Impact on society                                                             | 25        |
| 37 | <b>8. DISSEMINATION AND TRANSFERENCE OF FINDINGS</b>                               | <b>25</b> |
| 38 | 8.1. Dissemination plan                                                            | 25        |
| 39 | 8.2. Transference plan                                                             | 26        |
| 40 | <b>9. REFERENCES</b>                                                               | <b>27</b> |
| 41 |                                                                                    |           |
| 42 |                                                                                    |           |

## 43 **1. PROTOCOL SUMMARY**

44 New advances in neuroelectric and neuroimaging technologies in the last years  
45 provide a golden opportunity to further explore and understand how cognition and  
46 brain function can be stimulated by environmental factors, such as exercise, and  
47 particularly to study whether physical activity influences brain development in early  
48 ages. The present study, namely the ActiveBrains project, aims to examine the effects  
49 of a 20-week physical exercise program on cognition and brain, as well as on selected  
50 physical and mental health outcomes in preadolescents overweight/obese children. A  
51 total of 109 children with overweight/obesity aged 8 to 11.9 years will be randomized  
52 into an exercise group and a control group. The intervention will last 20 weeks, with 3-  
53 5 after-school sessions/week of 90 min each and will focus on high-intensity aerobic  
54 exercise mainly yet also includes muscle-strengthening exercises. The extent to what  
55 the intervention effect remains 8-months after the exercise program finalizes will also  
56 be studied in a subsample. Edge-cutting technologies will be used to assess cognitive  
57 performance, brain structure and function, by means of magnetic resonance imaging  
58 examination (both structural and functional) and an electroencephalogram  
59 examination (event-related brain potentials). The secondary outcomes will be grouped  
60 as physical health outcomes (e.g., physical fitness, body fatness, and bone mass and  
61 lipid-metabolic factors) and mental health outcomes (e.g. chronic stress indicators and  
62 overall behavioral and personality measurements such as anxiety or depression).  
63 Cross-sectional and longitudinal studies support that exercise might benefit  
64 cognition/brain in children; however, well-designed randomized controlled trials are  
65 needed to confirm or contrast these observational data, and to explore the causal  
66 pathways responsible for such associations. This project will substantially contribute to  
67 the existing knowledge and will have an impact on societies, since early stimulation of  
68 brain development might have long lasting consequences on cognitive performance,  
69 academic achievement and in the prevention of behavioral problems and the  
70 promotion of mental health.

## 71 **2. BACKGROUND**

### 72 **2.1. State of the art and rationale for the primary aim**

73 Over the last years, schools in USA and in some European countries have received  
74 pressure from different entities to reduce the time devoted to physical education in  
75 the school curriculum, arguing that more time spent in traditional and standard  
76 academic tasks would result in improvements in academic achievement. Several  
77 systematic reviews consistently suggest that this is a wrong assumption. Studies  
78 focused on increasing physical education time within the school hours and/or after  
79 school time have showed no negative effect on academic achievement (1,2). In fact,  
80 several studies support that regular physical activity might improve cognitive  
81 performance and brain functioning, which, in turn, would positively affect academic

82 performance (3–5). Several authors concluded that preadolescent children with better  
83 fitness have a better cognition, particularly the part of cognition related to executive  
84 control (3–5), but also learning and memory (6). They also observed differences in  
85 brain functioning, as measured by functional neuroimaging and electrophysiological  
86 techniques, and in brain structures, as measured by magnetic resonance imaging (MRI)  
87 voxel based morphometry, concluding that fitter children have healthier brains (7–9).

88         There are several studies looking at the effect of exercise on cognitive  
89 performance and academic achievement in children (1,3–5), however, very little is  
90 known about how exercise affect brain function and structure in children. To our  
91 knowledge, three randomized controlled trials have been conducted on this topic in  
92 young people. These studies have used neuroelectric and neuroimaging techniques.  
93 Monti et al. (FitKids study) (10), observed that a 9 months intervention, of high  
94 intensity aerobic exercise 2h/day x 5 days/week, improved relational memory in  
95 preadolescents children, as measured by an eye-movement method. This program also  
96 had a positive effect on working memory and task preparation processes as measured  
97 by event-related brain potentials (11). This intervention also decreased anterior  
98 prefrontal cortex activation from pre-test to post-test, measured by functional  
99 magnetic resonance imaging, which reflects a more mature brain function in children  
100 who underwent the exercise program (12). Davis et al. (Smart study), observed that a 3  
101 months aerobic exercise program improved executive function, increased bilateral  
102 prefrontal cortex activity and reduced bilateral posterior parietal cortex activity (13).  
103 The same research group has recently reported the main findings of an 8-month  
104 aerobic exercise-based trial (14). The intervention decreased activation in several brain  
105 regions on an antisaccade task compared to the control group, possibly reflecting  
106 increased efficiency. Such intervention additionally increased activation in both the  
107 incongruent versus fixation and incongruent versus congruent contrasts of a flanker  
108 task compared to the control group, possibly reflecting greater flexible modulation of  
109 cognitive control (14). Finally, this exercise program also positively influenced resting  
110 state synchrony, which reflects coherence in the functional organization of the brain  
111 independent of task performance (15).

112         This field is in its infancy and many questions remain to be answered. The  
113 ActiveBrains project will use cutting-edge technologies to address novel and sound  
114 research questions, such as how exercise influences the volume and functionality of  
115 specific brain regions, and networks related with memory and executive function, such  
116 us the prefrontal cortex, specially anterior cingulate and dorsolateral, hippocampus,  
117 posterior parietal, and basal ganglia.

## 118 2.2. State of the art and rationale for the secondary aims

119 The prevalence of pediatric obesity has reached epidemic proportions in most of  
120 developed and developing countries and it is a major public health problem. In Spain,  
121 pediatric obesity is of special concern. According to the data from the World Obesity

122 Federation ([www.worldobesity.org](http://www.worldobesity.org)), Spain leads the ranking of overweight/obesity in  
123 children aged 7-11 years in Europe, together with Malta and Sicily. Recently, we have  
124 objectively assessed physical activity levels in a sample of adolescents from 10  
125 different regions in Europe (9 countries) and observed that adolescents from south  
126 Europe (including Spain, Italy and Greece) were less active and more sedentary than  
127 adolescents from central-north Europe (16). The low activity levels observed in  
128 southern Europe might be responsible, at least in part, of the high prevalence of  
129 overweight/obesity and related cardiovascular disorders in southern Europe. Closely  
130 linked to obesity an important number of risk factors have been identified in children  
131 and increase their future risk for chronic diseases. Insulin resistance and other  
132 metabolic alterations in childhood have been consistently linked to paediatric obesity,  
133 and further studies are still needed to better understand which type of exercise is  
134 more efficient in reducing both adiposity and metabolic risk. In the present study, we  
135 will include a complete set of cardio-metabolic risk factors (blood pressure, lipid  
136 profile, insulin resistance, etc.), in order to study the effect of the exercise intervention  
137 on these factors.

138 Osteoporosis, and the associated fractures, is another major health problem.  
139 The economic burden of osteoporosis in Europe is higher than any kind of cancer  
140 (except lung cancer) or chronic cardiorespiratory diseases(17). Although the onset of  
141 osteoporosis is an adult disease, early prevention remains the most effective public  
142 health action. In this context, it has been consistently demonstrated that acquiring a  
143 high bone mass pick during childhood and adolescence, which can be largely  
144 influenced by exercise, is a key determinant of adult skeletal health (18). The  
145 ActiveBrains project will study the effect of our exercise-based intervention on bone  
146 mass and density.

147 Mental health is a major component of overall health, as defined by the World  
148 Health Organization (WHO). A key factor for a healthy mental status is a good  
149 management of chronic stress. The current evidence from prospective observational  
150 studies, both natural experiments examining real-life stressors and laboratory  
151 experiments, shows that stress modifies disease-relevant biological processes in  
152 humans. Moreover, experimental studies with animals strongly support a causal link  
153 between stress and disease, particularly, depression and cardiovascular disease (19).  
154 Several studies conducted in adults showed that exercise can reduce stress levels.  
155 However, the nature of stress in adults and in children is different, and little is known  
156 about how exercise might affect stress levels in children (20). Observational evidence  
157 suggests that high cardiorespiratory fitness in adulthood predicts lower risk of  
158 depression, both in cross-sectional and longitudinal studies (21). Likewise, adolescents  
159 with lower cardiorespiratory fitness level are more likely to have a diagnosis of  
160 psychosis (22) or schizophrenia (23,24).

161 Taking together the observational evidence on physical and mental health  
162 described above (both cross-sectional and longitudinal studies), well-design  
163 randomized controlled trials are needed. The ActiveBrains Project will contribute to  
164 the understanding of the causal effect of exercise not only on cognition and brain  
165 (primary aim), but also on a relevant set of physical and mental health outcomes  
166 (secondary aims).

### 167 2.3. Capacity of the principal investigator to successfully carry out this project

168 The Principal Investigator (PI) is a young but already internationally well-known  
169 researcher on the field of physical activity, fitness and health in young people, as  
170 shown in his CV. Dr. Ortega has participated in major coordinated national and  
171 European research projects in the last years (i.e. AVENA, HELENA, EYHS and ALPHA  
172 projects). Particularly, the HELENA and ALPHA are EU-funded projects in which the  
173 applicant had a major management and scientific role. In the HELENA study, he was  
174 the person in charge within the group for the physical fitness assessment in the 10  
175 European cities involved in the project. In the ALPHA study, he was the project  
176 secretary, as well as actively involved for the objective measurement of physical  
177 activity (through accelerometry), as well as coordinator of the fitness validity sub-  
178 project.

179 Regarding cognition (major outcome of this study), the applicant has recently  
180 coordinated a pilot study to determine the effect of exercise on fitness and cognition  
181 in adolescents. We observed that doubling the number of physical education sessions  
182 per week (i.e. 4 sessions/week) and their intensity had a positive effect on both  
183 academic achievement and cognitive performance (25). The findings strongly  
184 supported the key role of the intensity of the exercise to achieve improvements in  
185 cognition, something that has been taken into account for the exercise program of the  
186 present project. The PI has also examined how socioeconomic factors and sleep relates  
187 to cognitive performance in adolescents (26,27).

188 The PI has a large experience on the physical health outcomes included in this  
189 project (first set of secondary outcomes). As an example, in a recent longitudinal  
190 study, the PI led an article showing that improvements in cardiorespiratory fitness  
191 across puberty reduced the risk of developing overweight/obesity 6 years later (28).  
192 Recently, we reported that higher physical activity level might attenuated the adverse  
193 effect of a low birth weight on insulin resistance (29). A collaborative study with the  
194 University of South Carolina concluded that there is a subset of obese people who is  
195 metabolically healthy and, once cardiorespiratory fitness is taken into account, this  
196 subset of obese people has a lower risk of cardiovascular and cancer mortality,  
197 compared with the rest of obese people (30). In relation with bone health, the  
198 applicant has supervised a PhD Thesis examining the role of physical activity on youth's  
199 bone health. The applicant is a co-author of the largest meta-analysis ever conducted  
200 on gene-environment interactions on osteoporosis, as part of the EU-funded project,

201 the GEFOS consortium (GEnetic Factors for OSteoporosis Consortium). The analyses  
202 are being conducted on more than 50 different studies from Europe, USA and Australia  
203 (pooled N=150,000). The results will have a major impact on the understanding of how  
204 environmental factors, such as physical activity, interacts with genetics in relation with  
205 bone mass.

206 Regarding mental health outcomes included in this project (second set of  
207 secondary outcomes), the PI has investigated how psychological well-being and  
208 cardiorespiratory fitness relates to mortality in US adults (31). Likewise, the applicant  
209 has recently led a study in collaboration with researchers from Karolinska Institutet  
210 in Sweden involving more than 1 million adolescents and observed that adolescents  
211 with a very low muscular strength have 15-65% higher risk of having a psychiatric  
212 diagnosis (e.g. schizophrenia and mood disorders) and a 20-30% higher risk of  
213 premature death (<55 years-old) due to suicide (32).

### 214 **3. AIMS AND HYPOTHESES**

#### 215 **3.1. Overall hypothesis**

216 A 20-week exercise program will have a positive effect on cognition and brain  
217 parameters, as well as on a number of physical and mental health outcomes in  
218 preadolescent overweight/obese children.

#### 219 **3.2. Overall aim**

220 The general purpose of the present project, namely the ActiveBrains project, is to  
221 examine the effects of a 20-week physical exercise program on cognition and brain, as  
222 well as on selected physical and mental health outcomes in preadolescent  
223 overweight/obese children.

#### 224 **3.3. Specific aims**

##### 225 **PRIMARY AIM**

226 To examine the effects of a 20-week physical exercise program on brain structure and  
227 function, cognitive performance and academic achievement in overweight/obese  
228 preadolescent children.

##### 229 **SECONDARY AIMS**

- 230 • Objective 1: To study the effect of this intervention on physical health outcomes:  
231 physical fitness, body composition (including bone), glucose and lipid metabolism  
232 and blood pressure.
- 233 • Objective 2: To study the effect of this intervention on mental health outcomes:  
234 perceived and objectively measured stress, and an overall assessment of child  
235 behavior and personality, including self-esteem, anxiety and depression.

## 236 4. METHODOLOGY AND RESEARCH PLAN. TRIAL DESIGN

### 237 4.1. Brief description of facilities and equipment

238 The University of Granada has all the infrastructures and equipment for a successful  
239 development of the ActiveBrains project. The ActiveBrains project aims to study the  
240 effect of an exercise program on cognition and brain, as well as on selected physical  
241 and mental health outcomes. The work to be developed has 4 main pillars: 1) the  
242 exercise intervention itself; 2) assessment of cognitive parameters, as well as  
243 neuroelectric and neuroimaging measures; 3) assessment of physical health outcomes  
244 and 4) assessment of mental health outcomes.

245 The PI of this project has gathered a lot of experience on exercise intervention  
246 and assessment of physical health outcomes (pillars 1 and 3) from the previous  
247 projects in which he has participated (AVENA, HELENA, EYHS, ALPHA, EDUFIT). The  
248 University of Granada has now an impressive new facility, namely the Technology Park  
249 of Health Sciences of Granada (<http://en.ptsgranada.com/>). This Park is an area of over  
250 625,000 m<sup>2</sup> that brings together the infrastructure and quality services to the general  
251 objectives which aims: to become a space for teaching excellence, care, research and  
252 business, specializing on life sciences. The Park consists of a number of Research  
253 Centers and Institutes equipped with the latest advances in technology. One of these  
254 Research Centers is the newly built Research Institute of Sports and Health (iMUDS):  
255 [https://uceens.ugr.es/sobre-uceens/sedes/instituto-mixto-universitario-deporte-y-](https://uceens.ugr.es/sobre-uceens/sedes/instituto-mixto-universitario-deporte-y-salud/)  
256 [salud/](https://uceens.ugr.es/sobre-uceens/sedes/instituto-mixto-universitario-deporte-y-salud/). The constructions for this Institute finished in August 2013. The most advance  
257 equipment in different areas of sport sciences has been ordered, received and  
258 installed already at the Institute. The setting up of the new equipment will be finished  
259 by November 31st, 2013. This means that both infrastructures and equipment will be  
260 fully ready and working long before this project would start. The PI, because of his  
261 marked research profile, has been selected to settle his office in the Institute, which  
262 will happen in December 2013. The exercise program, assessment of physical fitness  
263 measures and body composition for the ActiveBrains project will be performed in this  
264 Institute using the latest and more advance technology. As an example, maximal  
265 exercise test will be conducted in the Institute, using a gas analyzer (General Electric)  
266 and the h-p-cosmos treadmill. Likewise, body composition analyses will be conducted  
267 using the most known densitometer in the world, the Discovery from Hologic, using  
268 pediatric software.

269 Biochemical analysis (part of pillar 3) will be done in close collaboration with  
270 the group headed by Prof. Angel Gil and Dr. Concepcion Aguilera, and represented in  
271 this project by Dr. Carolina Gómez. This research group is settled at the Research  
272 Institute of Biomedicine in Granada, which is next to (500m apart) the Research  
273 Institute in Sport Sciences, where the main part of the project will be physically carried



274 out. The physical proximity is very convenient and improves efficiency when  
275 transporting sample and between-researcher communication (e.g. frequent meetings).

276 In addition to the Research Institute of Sports and Health and the Research  
277 Institute of Biomedicine mentioned above, there is another new center just opened in  
278 the University of Granada, the Research Institute of Brain, Mind and Behavior. The  
279 assessment of cognition, brain measures and mental health will be carried out in this  
280 new Institute (Pillars 2 and 4). This Institute has been equipped with the most recent  
281 and up-to-date technologies, including the equipment required for the  
282 electroencephalogram and functional magnetic resonance imaging. Remarkably, the  
283 magnetic resonance machine just bought is one of the most advance and expensive at  
284 the moment (total cost = 1.7 millions of Euros), and will be available to be used in the  
285 present project. The center will have expert employees to handle these devices  
286 (technicians), and every examination will have an associated cost which is included in  
287 the budget of this project.

#### 288 4.2. Study sample and design

289 The ActiveBrains project is an individual randomized controlled trial (1:1) that aims to  
290 examine the effects of a 20-weeks physical exercise program on brain structure and  
291 function, cognitive performance, academic achievement and physical and mental  
292 health in overweight/obese children. Participants with overweight/obesity, meeting  
293 the eligibility criteria, are included in our study. The ActiveBrains project has been  
294 approved by the Review Committee for Research Involving Human Subjects at the  
295 University of Granada (Reference: 848, February 2014), and registered in the  
296 ClinicalTrials.gov (Identifier: NCT02295072). A total of 110 eligible (see inclusion  
297 criteria bellow) participants will be randomized into exercise group vs. control group.  
298 For feasibility reasons, the study is conducted in 3 waves: during the first academic  
299 year of the project (i.e. 2014–2015) we prepare protocols, set-up measurements  
300 techniques, and enroll in the study the first 20 children (50% allocated to each group);  
301 at the beginning of the following academic year (i.e. 2015–2016) we enroll another 45  
302 children (50% allocated to each group); and later on that academic year we enroll the  
303 remaining 45 children (50% allocated to each group), summing up with these 3 waves  
304 the aimed sample size of 110 participants. The control group receives regular physical  
305 education sessions (2 per week). Both exercise and control groups receive a pamphlet  
306 with recommendations for an active lifestyle and healthy eating habits. To study the  
307 extent to which the effect of the intervention remains or disappears once the formal  
308 intervention is finished, we will do a third evaluation 8 months after the intervention  
309 has finished. In the case that additional budget is obtained and the project prolonged,  
310 we will conduct the third evaluation in the whole sample.

311 The control group will receive the usual physical education sessions (2 per  
312 week). Based on existing literature, we believe that exercise is potentially beneficial for  
313 the physical and mental health of the overweight/obese children participating, and will

314 not be definitively harmful for them. Therefore, we decided to use the waitlist control  
315 group strategy, also used in previous studies in this field (10,11), which will be time  
316 and effort consuming, but it will increase moral and ethical values of the project. This  
317 strategy means that the wait-list control group also receives the exercise program  
318 after having completed all follow-up measurements included in the control arm.

319

320

### 321 4.3. Rationale for the age and weight status group selected for the study

322

323 We focus on overweight/obese children aged 8 to 11.9 years. The age group selection  
324 was made on the basis that childhood is a critical period where brain function,  
325 cognition, obesity and several comorbidities are still under development. Early  
326 stimulation on brain structure and functioning might have long term effects. We also  
327 selected a preadolescent sample since adolescence and pubertal physiological and  
328 psychological changes are dramatic, the speed of changes/maturation differs among  
329 individuals, and it is difficult to control these processes and confounding factors. It is  
330 known that overweight/obesity is related with a large number of adverse conditions,  
331 including metabolic dysfunction, poorer mental health (e.g. high depression risk, lower  
332 self-esteem) and recent reports support that excess in adiposity relates to worse  
333 cognition (11,33–35).

### 334 4.4. Sample size and power

335 Statistical Package for Social Sciences (IBM SPSS Statistics for Windows, version 20.0;  
336 Armonk, NY, USA) was used for calculations. It is difficult to estimate the appropriate  
337 sample size and power of our study since there is little information about previous  
338 exercise interventions on many of the outcomes here studied. Nevertheless, we have  
339 done an estimation based on a previous cross-sectional study and including some  
340 assumptions. This cross-sectional study observed a large effect size difference (Cohen-  
341  $d=0.6$ ) in brain structures (i.e. hippocampus) between children with low vs. high  
342 cardiorespiratory level in children (36). For this effect size, an alpha error of 5% and  
343 power of 80%, 60 people (30 in each group) would be necessary. However, in this  
344 study the differences between the low and high fitness groups in cardiorespiratory  
345 fitness (36.4 vs. 51.5 ml/kg/min, respectively) were large (i.e. Cohen- $d=3.5$ ) due to the  
346 fact that only both fitness extremes were included in the analysis (participants with a  
347 middle fitness level were excluded). Considering that an intervention study will lead to  
348 a smaller effect size than that between extreme groups reported above in the cross-  
349 section study, and also a potential dropout rate of 10% observed in similar studies  
350 (37), this project would need 100 participants for a 80% power and an alpha error of  
351 5%. If the economic budget allows it, we will try to recruit 10 more participants to a

352 maximum of 110. This sample size is feasible and realistic based on our previous  
353 experiences involving electroencephalograms and magnetic resonance imaging.

#### 354 4.5. Inclusion/exclusion criteria

355 *The eligibility criteria to participate in this study are: 1) children aged 8 to 11.9 years; 2)*  
356 *in the case of girls, pre-menstrual at the moment of baseline assessments; 3) classified*  
357 *as overweight or obese at baseline based on sex and age specific World Obesity*  
358 *Federation cut-off points (38,39); 4) not to have any physical disability or neurological*  
359 *disorder that impeded exercise; 5) not to use medications that influenced central*  
360 *nervous system function; 6) right-handed as assessed by the Edinburgh inventory (40);*  
361 *and 7) no previous diagnosis of attention-deficit hyperactivity disorder (ADHD) and a*  
362 *score above the 85<sup>th</sup> percentile as measured by the ADHD rating scale (41). Children*  
363 *with psychiatric diagnosis at baseline or during the trial will also be excluded from the*  
364 *analyses. Every child randomized to the exercise group will go through complete*  
365 *medical examination, and children with any medical condition that would affect the*  
366 *results of the evaluations or that limit the normal capacity to do exercise will be*  
367 *excluded.*

#### 368 4.6. Recruitment and randomization

369 *The recruitment process will start by contacting families of children with*  
370 *overweight/obesity from databases at the Unit of Pediatrics of the University Hospitals*  
371 *San Cecilio and Virgen de las Nieves (Granada, Spain). Additional strategies include*  
372 *contacting the head teacher of both, public and private schools of Granada to spread*  
373 *informative pamphlets. Furthermore, advertising related to the project will be*  
374 *broadcasted in the local media through newspaper, radio, and television outlets. The*  
375 *current Spanish health system cannot afford a free of charge exercise program for all*  
376 *those overweight/obese children who would benefit from it. Therefore, the*  
377 *ActiveBrains project is offering to overweight/obese children and their families a well-*  
378 *designed and controlled exercise program that is a recommended “treatment” by*  
379 *paediatricians without any cost for the families. Because of the wait-list control group*  
380 *strategy, all the participants benefit from the program. Three paediatricians and two*  
381 *nurses are involved in the study and they do a basic clinical examination, including*  
382 *physical examination, weight, height, blood pressure and pubertal status assessment.*

383 *Simple random allocation of participants into exercise or control groups will be*  
384 *performed with a ration 1:1 using a computer random number generator in Statistical*  
385 *Package for Social Sciences (IBM SPSS Statistics for Windows, version 20.0; Armonk,*  
386 *NY, USA) by a “blinded” individual not involved in the exercise sessions nor outcome*  
387 *evaluations (FBO). This method allows for the equal probability of being allocated to*  
388 *one group or another. To reduce the risk of bias, several protocols will be followed: 1)*  
389 *the computer random generation will be conducted by a person not involved in the*  
390 *outcome evaluations; 2) randomization will be performed immediately after the*

391 *baseline evaluation; and 3) the physical trainers running the exercise program will not*  
392 *be involved in the outcome evaluations or randomization. Randomization is done*  
393 *immediately after the baseline assessment is completed in order to reduce the risk of*  
394 *bias during the assessment.*

#### 395 4.7. Intervention

396 The intervention consists of 20-weeks exercise program. It is our aim to test whether  
397 the internationally accepted physical activity guidelines  
398 (<http://www.health.gov/paguidelines/>) are effective to improve brain structure and  
399 function and cognition as well as physical and mental health in overweight/obese  
400 children. The guidelines recommend children to exercise daily, and, therefore, we offer  
401 the possibility to attend to the exercise program (out-of-school, at the Research  
402 Institute of Sports and Health) daily from Monday to Friday (i.e. 5 sessions in the  
403 evening/week, 90 min/session). However, we are aware that in addition to our  
404 exercise program children in Spain usually have 2 physical education sessions per week  
405 and many of them also have sport-based after-school activities twice per week. Taking  
406 this into account, we will inform parents and participants that our exercise program is  
407 offered 5 sessions per week, but the minimum attendance recommended is 3 times  
408 per week. The physical exercise program will be conducted on a group basis (i.e., 3  
409 waves of intervention) and based on active games, with a noticeable emphasis on the  
410 playful component in order to increase adherence to the program. Each session is  
411 structured in four parts: 1) a 5-10 min warm-up consisting of 1-2 physical games of 5  
412 min each; 2) a 60-min aerobic part consisting of around four to five physical multi-  
413 games requiring moderate-to-vigorous intensities, with special emphasis on high-  
414 intensity activities (outdoor playground); 3) a 20-min resistance training part consisting  
415 of muscle- and bone-strengthening game-based activities (indoor gym). The resistance  
416 part includes exercises involving large-muscle-groups for which therabands, fitballs as  
417 well as participant's own bodyweight were used; and 4) a 5-10 min cool-down part  
418 consisting of stretching and relaxation exercises.

419 The intensity of the exercise program is monitored in all children across the  
420 whole exercise program. Participants' progress relative to exercise intensity will be  
421 checked weekly by trained personnel to: (i) adapt the intensity of the program  
422 progressively according to the improvements of the participants; and (ii) to identify  
423 whether any child is training at lower intensities than the rest of the group, thus  
424 requiring higher motivation during the exercise sessions. The heart rate data will be  
425 recorded during both the aerobic and the resistance training components. Every child  
426 will wear the same HR monitor (POLAR RS300X, Polar Electro Oy Inc., Kempele,  
427 Finland) individually programmed based on their maximum heart rate previously  
428 achieved in the maximal incremental test (see test measurement description below).  
429 Moreover, we will also program the monitors individually at 80% of the maximal heart  
430 rate and at the level of the anaerobic threshold, so that we can later obtain the

431 accumulated time over the 80% of the maximum HR and over the anaerobic threshold.  
432 The ratio of coaches and participants will be 1:15 approximately.

#### 433 4.8. Rationale for the exercise program design

434 Previous literature showed that aerobic exercise is the most effective type of exercise  
435 to improve brain and cognition (42); consequently, this project has a special emphasis  
436 on aerobic exercise. However, since this project is an intervention aiming to achieve a  
437 benefit not only on children's brain and cognition, but also on general physical and  
438 mental health, we also include activities that enhance muscular strength and speed-  
439 agility, as well as activities that strengthen children's bones. Evidence, mainly based on  
440 observational studies, supports a link between aerobic fitness and cognition, but there  
441 is little information for other components of physical fitness, i.e. muscular strength or  
442 speed-agility. One observational study by Castelli et al. reported an association  
443 between cardiorespiratory fitness and academic achievement, but not between  
444 muscular strength and academic achievement in children (42).

445 High intensity exercise is an important goal to achieve in every session of the  
446 program since there are reasons to believe that this kind of exercise is the most  
447 effective for different health outcomes, and it seems also for cognition and brain. As  
448 an example, Castelli et al., observed that preadolescents who spent more time of the  
449 sessions at high intensities (above the 80% of heart rate maximum) showed larger  
450 improvements in cognitive performance (43). In order to obtain objective and high  
451 quality data on the relative intensity and physiological demands of our physical  
452 exercise program every child in the exercise group wear a heart rate monitor during all  
453 the sessions of the program.

454 The length of the intervention (20-weeks during a school-academic year) is  
455 within the timeframe used in the previous randomized controlled trials on this topic,  
456 i.e. 3 months (13) and 9 months (10). It has often been reported that when an  
457 intervention program is implemented, it might have a compensatory effect, so that the  
458 participants stop doing other physical activities that they would have done otherwise.  
459 To study this issue, we will assess physical activity using activity monitors (i.e.  
460 accelerometers) over 7 days at 3 different time-points during the study: baseline,  
461 middle of the intervention and post- intervention.

#### 462 4.9. Strategies to enhance compliance and adherence to the program

463 Participants and their parents will be verbally motivated to participate in the program  
464 and to attend to all the assessment and exercise program sessions. Our goal was that  
465 children attend at least 3 sessions per week. However, we encourage the children and  
466 their families to attend 4 or 5 sessions per week whenever possible. Children who  
467 complete successfully the program get a "certificate" as "successful completers".  
468 Children are the key part of this project and they deserve acknowledgements from this

469 project and for their positive attitude and willingness (and their family) to participate  
470 in this project.

#### 471 4.10. Primary outcomes

472 The full set of primary and secondary outcomes are assessed twice, immediately  
473 before and after the 20-weeks exercise program. A third assessment will be conducted  
474 8 months after the intervention finishes. Children and parents will not receive any  
475 incentives or money paid for the evaluations.

#### 476 1. FUNCTIONAL AND STRUCTURAL MAGNETIC RESONANCE IMAGING

477 The neuroimaging techniques, particularly structural and functional MRI, provide a  
478 great opportunity to deepen into the field of exercise and brain structure and function.  
479 In the present project, we plan to conduct the following protocol using structural and  
480 functional 3.0 Tesla Siemens Magnetom Tim Trio scanner MRI (Siemens Medical  
481 Solutions, Erlangen, Germany) with a 32-channel head coil (total time = 40–45 min,  
482 including rest between MRI sequences):

- 483 a. High resolution scanning (7min 31 s). This provides structural information of  
484 the whole brain. We will look at individual changes in the whole brain since  
485 much needs still to be discovered about the effect of exercise on brain. Based  
486 on existing literature (5,9,36), we also specifically analyze the effect of the  
487 program on the prefrontal cortex, anterior cingulate cortex, dorsolateral  
488 prefrontal cortex, basal ganglia (dorsal and ventral striatum; and the region  
489 globus pallidus), insular and parietal cortices, superior frontal sulcus and  
490 hippocampus (special interest on the dentate gyrus region). The hippocampus,  
491 which is a subcortical brain region that is vital for relational memory,  
492 demonstrates both a high plasticity and a high capacity for synaptic  
493 modulation. High-resolution, T1-weighted images will be acquired using a 3D  
494 MPRAGE (magnetization-prepared rapid gradient-echo) protocol. The  
495 acquisition parameters are the following: repetition time (TR) = 2,300 ms; echo  
496 time (TE) = 3.1 ms; inversion time (TI) = 900 ms; flip angle = 9°; field of view  
497 (FOV) = 256 x 256; acquisition matrix = 320 x 320, 208 slices; resolution = 0.8 x  
498 0.8 x 0.8 mm; and scan duration = 6 min and 34s (44,45).
- 499 b. Functional magnetic resonance in resting state (5 min 26 s). This provides  
500 information about the effect of the program on brain functioning in a resting  
501 situation. The resting-state functional MRI data consists of a series of 160 scans  
502 acquired using a Gradient Echo Pulse Sequence while participants rest with  
503 eyes closed. The parameters are as follows: TR = 2000 ms, TE = 25 ms, flip angle  
504 = 80°, FOV = 240 mm, acquisition matrix= 240 x 240, 35 slices, resolution = 3.5 x  
505 3.5 x 3.5 mm, and scan duration of 5 min and 26s.
- 506 c. Diffusion Tensor Imaging (DTI) (5 min 18 s). This provides information about  
507 neuronal connectivity and fibre structure in white matter.

508

## 509 **2. NEUROELECTRIC MEASUREMENTS**

510 *a.* We use the modified flanker task (MFT) to assess inhibition and delayed  
511 nonmatch to sample (DNMS) task to evaluate learning and memory.  
512 Simultaneously with these tasks, we measure selected components of the  
513 event-related brain potentials. For example, we analyze the amplitude and  
514 latency of P3 (also called P300). Higher P3 amplitude is considered an  
515 indicator of a better ability to recruit attentional resources (46), while a  
516 lower P3 latency is considered an indicator of faster cognitive processing  
517 speed (46).

518 *b.* Event-related brain potentials, obtained from the electroencephalogram,  
519 assess aspects of human information processing, and have provided insight  
520 into the underlying brain mechanisms involved in cognitive function beyond  
521 that of overt behavioral task performance. In our study, we use the  
522 ActiveTwo System of Biosemi (64-channel, DC amplifier, 24-bit resolution,  
523 biopotential measurement system with Active Electrodes). The complete  
524 assessment (i.e. preparation plus the time devoted to the tasks) takes  
525 about 80–90 min.

526

## 527 **3. COGNITIVE PERFORMANCE**

528 We focus on a set of tests, which are internationally well-known and validated in  
529 children, mainly aiming to assess executive function (also called cognitive control or  
530 executive control), which has shown to be the most sensitive to be influenced by  
531 exercise (3–5). The specific constructs to be measured and tests chosen for such  
532 purpose are (total testing time 60 min approximately):

533 *a.* K-BIT, Kaufman Brief Intelligence test that measures both verbal and non-  
534 verbal intelligence (47).

535 *b.* The Design Fluency Test (48–50) measures one's initiation of problem-solving  
536 behavior, fluency in generating visual patterns, creativity in drawing new  
537 designs, simultaneous processing in drawing the designs while observing the  
538 rules and restrictions of the task, and inhibiting previously drawn responses.  
539 This test belongs to the test battery DKEFS, Delis-Kaplan Executive Functions  
540 System.

541 *c.* The Stroop Color-Word Test is used to measure cognitive inhibition (DKEFS)  
542 (51).

543 *d.* The Zoo Map Test measures spatial planning, rule learning, inhibition of  
544 impulsive and perseverative responding, and the ability to establish and  
545 maintain instructional set.

546 *e.* The Trail Making Test measures flexibility of thinking on a visual-motor  
547 sequencing task (DKEFS) (52).

548

#### 549 **4. ACADEMIC ACHIEVEMENT**

550 We evaluate this important dimension using two methods:

551 *a.* First, we use the final school grades obtained the year before the intervention  
552 (e.g. June 2014) and after the intervention (e.g. June 2015). This is the final  
553 result of many factors and what parents and society worry about the most.  
554 However, there is a potential systematic bias among different schools and  
555 teachers, so it is optimal to complement this measure with a standardized  
556 measure of academic achievement (see below).

557 *b.* Second, we additionally use the Batería III Woodcock-Muñoz™ (age range 2 to  
558 90 years-old), which is the Spanish adaptation/translation of the Woodcock-  
559 Johnson III®(WJ III®) (53). This battery has a specific academic achievement  
560 battery (testing time: 70–90 min) that consist of the following tests: 3 tests of  
561 reading, 2 tests of oral language, 3 tests of mathematics, 3 tests of written  
562 language and 1 test of academic knowledge (i.e. Science, Social Science and  
563 Humanities).

564

#### 565 **5. OTHER BRAIN-RELATED MEASURES**

566 There is increasing evidence supporting that beneficial effects of exercise on the body  
567 and brain are mediated by the brain-derived neurotrophic factor (BDNF) (54). Within  
568 this context, findings from recent reviews and meta-analysis support the role of  
569 exercise as a strategy to increase the BDNF activity in humans (55,56). The BDNF acts  
570 on certain neurons of the central nervous system and the peripheral nervous system,  
571 helping to support the survival of existing neurons and encourage the growth and  
572 differentiation of new neurons and synapses. The BDNF has shown to act together  
573 with another important protein, the Epidermal Growth Factor (EGF), activating  
574 Neuronal m-Calpain, which plays a significant role in synaptic plasticity, cell motility,  
575 and neurodegeneration. The circulating blood BDNF is measured in serum using the  
576 RayBio Human BDNF ELISA (Enzyme- Linked Immunosorbent Assay) kit.

#### 577 **4.11. Secondary outcomes**

##### 578 **1. PHYSICAL HEALTH OUTCOMES**

579 *a.* Physical fitness (cardiorespiratory fitness, muscular strength and speed-agility)  
580 is assessed following the ALPHA fitness test battery (57). Briefly,  
581 cardiorespiratory fitness is assessed by the 20m shuttle run test; muscular  
582 strength is assessed by handgrip strength test and standing long jump test and  
583 speed-agility is assessed by 4 × 10m shuttle run test. Cardiorespiratory fitness is  
584 additionally assessed using a gas analyser (General Electric Corporation) while  
585 performing and maximal incremental treadmill (hp-cosmos ergometer) test  
586 modified for poorly fit children (37). Participants walk on a treadmill at a



587 constant speed (4.8 km/h) with a 6% slope with grade increments of 1% every  
588 minute until volitional exhaustion. Children are encouraged to walk as long as  
589 they can. This test is done by Sport Medical Doctors from the Andalusian  
590 Centre of Sport Medicine. Maximal oxygen consumption ( $\text{VO}_2\text{max}$ , ml/kg/min),  
591 heart rate and respiratory exchange ratio (RER) are recorded each 30 second.  
592 Ratings of perceived exertion (RPE) using children's OMNI scale (58) is  
593 registered at the end of each 1 minute stage.  $\text{VO}_2\text{max}$  is confirmed when  
594 meeting the 3 out of 4 following criteria: volitional fatigue (N8 points in the  
595 OMNI scale), a plateau in  $\text{VO}_2\text{max}$  during the last two exercise work rates (2.0  
596 mL·kg<sup>-1</sup>·min<sup>-1</sup>), achieving >85% of age-predicted heart rate maximum (59)  
597 and a RER of  $\geq 1.10$ . In addition to the field-based tests from the ALPHA battery,  
598 we assess muscular strength in laboratory condition using pneumatic resistance  
599 machines (Keiser Sports Health, Fresno, CA, USA). According to previous studies  
600 in paediatric population, we determine each participant 1 repetition maximum  
601 (1RM) strength in bench press and leg press tests (60–63). The 1RM is recorded  
602 as the maximum resistance that is able to lift throughout the full range of  
603 motion. Participants receive familiarization sessions before testing session in  
604 order to ensure an adequate technique (i.e. controlled movements and proper  
605 breathing). Using standardized procedures (63), before attempting a 1RM,  
606 participants perform 6 repetitions with a light load and 3 repetitions with a  
607 heavier load (50–90% estimated 1 RM). Then, a series of single repetitions with  
608 increasing loads (0.5–2.3 kg for bench press and 10–20 kg for leg press) are  
609 performed. The 1 RM is determined when participants falling short of the full  
610 range of motion on at least 2 not consecutive attempts. During testing,  
611 participants have 3–5 minutes of resting between trials. RPE using children's  
612 OMNI-Resistance Exercise scale (64) is registered for each attempt. Moreover,  
613 during all testing procedures the examiner asks “How do you feel?”, “Is the  
614 load light, medium or heavy?” and “Could you lift more?” to aid the  
615 progression of the 1 RM trials. 1 RM of bench press and leg press perform in  
616 the 80% of the whole sample.

617 *b.* Subjective perception of the level of physical fitness is measured by  
618 International Fitness Scale (IFIS). The IFIS is a reliable, simple and short self-  
619 administered scale composed of five Likert-scale questions about the perceived  
620 youth overall fitness and the main components: cardiorespiratory fitness,  
621 muscular fitness, speed-agility, and flexibility in comparison with their friends’  
622 physical fitness (very poor, poor, average, good and very good) (65). IFIS has  
623 shown a good validity against measured fitness in children of this age range  
624 (66).

625 *c.* Physical activity and sedentary time are assessed by accelerometers. A tri-axial  
626 accelerometer (Actigraph GT3x, Pensacola, FL, USA) is used to assess physical  
627 activity and sedentary time over 7 consecutive days. Participants are instructed

628 to wear two devices: one attached using an elastic band to the right hip and  
629 one attached to the non-dominant wrist (which in all cases is the left one).  
630 Children wear the accelerometers 24 h and remove it only while bathing or  
631 swimming. Also, children have a log in order to record the time when they go  
632 to bed, wake up, and remove the device.

633 *d.* Self-report of physical activity levels and sedentary behaviors in youth are  
634 assessed by the Youth Activity Profile — Spain (YAP-S). The YAP-S was designed  
635 to be a self-administered 7-day recall questionnaire suitable for use in children  
636 (67). Under the umbrella of the ActiveBrains project, we translated (into  
637 Spanish) and back-translated (to test possible deviations from the English  
638 original version), as well as culturally adapted, in collaboration with the original  
639 authors of the YAP. Calibration studies on the YAP-S is being conducted during  
640 our study using the accelerometer data collected the week immediately before.  
641 The test–retest reliability of this tool is also being tested in a different sample.  
642 The test includes 15 items that ask about activity at school, activity out of  
643 school, and sedentary habits.

644 *e.* Commuting to and from school is evaluated by a self-reported questionnaire.  
645 Participants answer the following questions “How do you usually travel to  
646 school?” and “How do you usually go back to school?”. Also, the second set of  
647 questions refers to the way of commuting to and from school during a week.  
648 The responses can be: by walk, bike, motorbike, car, bus, several transports or  
649 other transport requesting in these cases.

650 *f.* Anthropometrics measurements. Weight, height, body mass index, waist  
651 circumference and triceps and subscapular skinfolds thickness are evaluated.  
652 Body weight is measured with an electronic scale (SECA 861, Hamburg,  
653 Germany) and height (cm) with a stadiometer (SECA 225, Hamburg, Germany).  
654 In addition, we assess peak height velocity (PHV) as an accurate and  
655 discriminant measure of maturational status (68). PHV was calculated from age  
656 and anthropometric variables following Moore’s equations (69). Years from  
657 PHV were calculated by subtracting the age of PHV from chronological age, so  
658 that it is interpreted as how many years from the PHV offset a person is, with a  
659 value ranging from negative values (before the PHV; less mature) to positive  
660 values (after the PHV; more mature).

661 *g.* Body composition and bone mineral density are assessed by Dual- energy X-ray  
662 absorptiometry (DXA, Discovery densitometer from Hologic), following  
663 protocols used in our previous studies (70,71). Likewise, fat mass, fat-free  
664 mass, total body water and bone mass are assessed by the TANITA  
665 bioimpedance balance (BC-418 MA, TANITA International Division, TANITA, UK).

666 *h.* Traditional cardio-metabolic risk factors include a complete set of risk factors  
667 as markers of lipid profile (triglycerides and total-, HDL and LDL-cholesterol),  
668 blood pressure (following standard procedures), and insulin resistance (glucose

669 and insulin, homeostasis model assessment, HOMA). Blood sample (in fasting  
670 condition) is collected before and after the exercise program and 8 months  
671 after the intervention finishes. It is divided in 4 tubes in order to obtain plasma  
672 aliquots, haematological sample, serum aliquots and biochemical parameters.

673 *i.* DNA (Deoxyribonucleic acid) and RNA (Ribonucleic acid) analyses. We freeze  
674 the blood, plasma, serum samples, so that they can be analyzed later when the  
675 intervention and outcome assessments are finished. This strategy provides us  
676 with the most up- to-date list of candidate genes for the different study  
677 outcomes.

678

## 679 **2. MENTAL HEALTH OUTCOMES**

680 All questionnaires were validated and created to be applicable to children, and  
681 therefore, the children will read and understand the questions by their own. An  
682 evaluator will be when the children completed the questionnaires to confirm their  
683 understanding of the questions.

684 *a.* Stress will be measured by the Children's Daily Stress Inventory (CDSI), a  
685 measure that assesses daily stress in primary school children. The inventory  
686 was validated in a sample of 1094 primary school Spanish students (72). The  
687 final version includes 22 dichotomous items covering the areas of health,  
688 school/peers, and family. Also, parents have to complete this questionnaire  
689 thinking as if they were their own children. An objective measure of stress is  
690 heart rate variability, which is defined as the variations of both instantaneous  
691 heart rate and RR intervals on the electrocardiogram. In a healthy situation,  
692 considerable variability (i.e. within the range) reflects the heart's ability to  
693 adequately respond to physiological and environmental stimuli. There is  
694 accumulating evidence indicating that a lowheart rate variability is an indicator  
695 of chronic stress (73). Each child is individually examined in a quiet room in the  
696 supine position for 10 min and comforting music is played to encourage a  
697 relaxation status. We use the top-class heart rate monitors, Polar RS800CX  
698 (Kempele, Finland), for the measurement (i.e. 10 min) of heart rate variability  
699 parameters. This device has established validity compared to the gold standard  
700 of an electrocardiogram device in children (74).

701 *b.* Childhood trait anxiety is measured with the trait score of the State–Trait  
702 Anxiety Inventory for Children (STAIC-T). It is a 20 item self- administered  
703 instrument which is widely used, reliable (Cronbach alpha=0.94) and  
704 extensively validated (75). Parents complete the same questionnaire according  
705 to their own perceptions about their children.

706 *c.* Children Depression Inventory (CDI) is used to assess depression. The test has  
707 five scales (negative mood, ineffectiveness, anhedonia, negative self-esteem  
708 and interpersonal problems) which are based on the children experiences (76).

709 It comprises 27 items. Parents complete the same questionnaire according to  
710 their own perceptions about their children.

711 *d.* Self-concept is evaluated with the Self-concept form 5 (AF5). Physical, labor,  
712 social, family and emotional dimensions are assessed with this test. Children  
713 have to complete 30 items with a response scale between 1 and 10.  
714 Psychometrics properties showed an internal consistency for the AF5 of 0.83  
715 for all dimensions, while for the individual dimensions were 0.90 for academic,  
716 0.69 for social, 0.71 for emotional, 0.78 for family and 0.77 for physical (77).

717 *e.* Body image is evaluated by the Children's Body Image Scale (CBIS) for  
718 preadolescent children (78). The test use gender specific figures posed in the  
719 anatomical position. Each figure is a modified photo- graph of an anonymized,  
720 pre-pubescent boy or girl with a BMI within the specified range for one of  
721 seven percentiles (3rd, 10th, 25th, 50th, 75th, 85th, 97th) or body composition  
722 categories established by the WHO (formerly named the International Obesity  
723 Task Force) cut-off (79). Participants have to select their perceived and ideal  
724 body size from 7 figures representing body sizes from underweight to obesity.  
725 Body dissatisfaction is obtained by subtracting the ratings of participants' ideal  
726 body size from their perceived current body size.

727 *f.* Self-efficacy is assessed using the General Self-Efficacy Scale (GSE). The GSE is a  
728 10 items scale designed to evaluate the positive belief in one's ability to  
729 achieve goals or deal with the challenges across various stressful situations.  
730 Reliability analyses showed that Cronbach alpha ranged from 0.76 to 0.90 (80).

731 *g.* Self-esteem is assessed by the Rosenberg Self-Esteem scale (81), which is  
732 composed by 10 items. Participants have to mark if they agree or disagree with  
733 each statement. The Rosenberg scale is widely used in studies with children  
734 and adolescents (82,83). To be more sensitive in specific parts of mental health,  
735 we decided to assess self- concept and self-esteem separately.

736 *h.* The Positive Affect Schedule for Children (PANAS-C) evaluates in 20 items  
737 positive affect and negative affect in children (84). The PANAS- C has shown a  
738 Cronbach alpha from 0.87 to 0.90 for the positive affect subscale and from 0.87  
739 to 0.94 for the negative affect subscale (85). Parents complete the same  
740 questionnaire according to their own perceptions about their children.

741 *i.* Happiness is measured by the Subjective Happiness Scale (SHS) (86), which  
742 includes 4 items. The Spanish version of SHS showed an adequate internal  
743 consistency, appropriate test–retest reliability and convergent validity (87).

744 *j.* Dispositional optimism is evaluated with the Life Orientation Test—Revised  
745 (LOT-R) (88). The test comprises 10 statements. LOT- R is a useful, valid and  
746 reliable self-report measure to properly assess optimism in adolescent (89).

747 *k.* As an overall measure of behaviour and personality traits of the children, we  
748 use the Behavioural Assessment System for Children (BASC), the version  
749 reported by parents, which measures relevant dimensions such as Aggression,

750 Hyperactivity, Conduct Problems, Anxiety, Depression, Somatization, Attention  
751 Problems, Atypicality, Withdrawal, Adaptability, Leadership and Social Skills.

752

### 753 3. OTHER OUTCOMES

754 a. Children attitude and self-perceptions toward physical activity are evaluated  
755 with Children's Self-Perceptions of Adequacy in and Predilection for Physical  
756 Activity (CSAPPA) questionnaire. The scale has 20 items (7 for adequacy, 10 for  
757 predilection and 3 for enjoyment). CSAPPA have shown to be a useful, reliable  
758 and valid tool to measure perception of subjects' adequacy in, predilection for,  
759 and enjoyment of physical activity in Spanish school context (90).

760 b. Health-related quality of life is measured by a new, valid and feasible tool  
761 called Child Health Utility 9D (CHU9D) (91,92). This test was designed  
762 specifically for young people (7–11 years). The CHU9D consists of 9 dimensions:  
763 worried, sad, pain, tired, annoyed, school- work/homework, sleep, daily  
764 routine, and ability to join in activities with 5 different levels representing  
765 increasing levels of severity within each dimension. In addition, CHU9D scores  
766 are used in cost-utility analyses (93).

767 c. Ad-hoc injury questionnaire is applied when the participant present an injury.  
768 Questions such as type of injury, description and localization of the injury,  
769 modifications of the session due to the injury, grade of the injury, type of  
770 exercise in the moment of the injury and how long have been the participant  
771 performing the session are registered by the monitor of the program.

772 d. Sleep quality is assessed by accelerometry (Actigraph GT3x, Pen- sacola, FL,  
773 USA). The accelerometer data procedures have been explained above (i.e.  
774 physical activity and sedentary section). Additionally, we use the Paediatric  
775 Sleep Questionnaire (PSQ) as a measure of night time and sleep behavior,  
776 daytime behavior and other possible problems and inattention and  
777 hyperactivity. The Spanish version of the PSQ showed internal consistency and  
778 high reliability (94). This questionnaire is completed by the parents, who are  
779 asked to rate each item according to their child's usual sleep habits.

780 e. Dietary assessment: two non-consecutive 24-hour recalls are applied referring  
781 to weekdays whereby all the foods and drinks consumed on the previous day  
782 are recorded to the interviewer. The 24-hour recalls are conducted in presence  
783 of the child's parents because they can report dietary intake with more  
784 reliability than the children (95) and it has been considered to be the best  
785 method to evaluate energy intake in children (from 4 to 11 years) (96).  
786 Nutritionists use a photographic manual of food portion size to improve the  
787 estimated amount of dietary intake. All the data is registered by the EasyDiet  
788 software (© Biocentury, S.L.U. 2016), which is the software supported by the  
789 Spanish Association of Dietetics and Nutritionists. Moreover, frequency of food  
790 intake is evaluated by food frequency questionnaire (97). It contains questions

791 regarding the average frequency and amounts of 72 selected foods. A  
792 nutritionist interviews the child and at least one of parents. The adherence to  
793 the Mediterranean diet (AMD) is assessed using the KIDMED questionnaire  
794 (98).

795 *f.* Perinatal data such as birth weight, birth length and birth head circumference  
796 are asked by an ad-hoc questionnaire. Type of breastfeeding and duration and  
797 several questions about the mother pregnancy such as weight gain and smoke  
798 are recorded by a self-report questionnaire.

799 *g.* Cost-effectiveness is assessed by ad-hoc questionnaire. Number of  
800 paediatrician's visits, days in the hospital, medicines intake and its cost and  
801 whether their child had had day lost study due to overweight/obese or other  
802 health problems during the last 20-weeks are answered by parents.

803 *h.* Educational level, profession and socioeconomic status (determined by Family  
804 Affluence Scale questionnaire) are asked to parents (99).

#### 805 4.12. Data analysis plan

806 Two analysis will be defined: the per-protocol analysis and the intention-to-treat (ITT).  
807 We will use the per-protocol principle to report the main findings for all behavioral and  
808 MRI outcomes in all children with overweight/obesity that followed these criteria: (1)  
809 completed the study and the pre- and post-intervention assessments, and (2) attended  
810 at least 70% of the recommended 3 sessions/week (i.e., exercise group). Main analyses  
811 will be performed using the per-protocol criteria for two reasons: 1) we are interested  
812 in knowing the efficacy rather than effectiveness of our intervention, i.e., we want to  
813 know the effects on brain health outcomes when a child actually does the planned  
814 exercise program (operationally defined as attending a minimum of 70% of the  
815 sessions); and 2) in the field of neuroimaging, with analyses conducted directly on  
816 images, it is rarely done and technically difficult, to apply imputation methods on  
817 images missing at post-exercise evaluations. Therefore, participants who complete  
818 both pre- and post-intervention evaluations are usually included in analyses.  
819 Moreover, we will additionally analyze the data using the ITT. Under the ITT principle,  
820 we will use multiple imputation for observations lost at post-intervention (100).

821 The main effects of the exercise program versus control on the study outcomes  
822 will be examined taking a previous major RCT that also tested the effect on cognitive  
823 outcomes (101) as reference and using ANalysis of COVariance (ANCOVA) including  
824 post-intervention outcomes as dependent variables, group (i.e., exercise vs. control) as  
825 a fixed factor, and baseline data of the study outcome as covariate. This model  
826 indicates the time x group interaction intended to know the effects of the intervention  
827 by including the study outcome baseline value as covariate and the post-intervention  
828 outcome as dependent. The z-scores for each outcome at post-exercise program will  
829 be formed by dividing the difference of the raw score of each participant from the

830 baseline mean by the baseline standard deviation (i.e., (post-exercise individual value –  
831 baseline mean) / baseline SD).

832 MRI data need to be handled using methods specifically developed for this  
833 field. Our group has expertise in MRI data analysis and will choose the best approach  
834 to every single research question addressed.

835 The statistical procedures will be performed using the SPSS software (version  
836 20.0, IBM Corporation) and R software (v. 3.1.2, <https://www.cran.r-project.org/>). A  
837 significant difference level of  $P < 0.05$  will be set. Additionally, we will investigate  
838 which of the significant findings persist after adjustment for multiple testing on the  
839 primary outcomes (102).

## 840 **5. CONTINGENCY AND RISK MANAGEMENT PLANS**

841 There are three main contingency and risk plans to take into account:

- 842 1. The study of the effect of exercise on cognition and brain is the most novel, original  
843 and scientifically sound part of the present project. However, very little is known  
844 about how the brain works and how brain might react to the chronic stimulus of  
845 exercise. This part is therefore high impact-high risk. For this reason, the  
846 ActiveBrains project has developed a contingency and risk management plan. In  
847 addition to the primary aim, the project has been designed to address two other  
848 interesting and relevant research questions (secondary aims), particularly how  
849 exercise influences selected physical and mental health outcomes. These research  
850 questions are also novel; however, there is more previous literature on them which  
851 necessary reduces the risk.
- 852 2. We are aware that the recruitment of participants for the first wave is challenging,  
853 since the study has just started. If for example, 15 instead of 20 participants are  
854 recruited by the time the intervention should start, we will go ahead with the  
855 intervention and for the second wave 50 children will be recruited instead of 45  
856 planned. Recruitment for the second and third wave is easier, since we have nearly  
857 1 year for recruitment. If number of participants for the first wave is too low, we  
858 will use other strategies to increase the recruitment (e.g. visits schools,  
859 advertisement in newspapers and websites).
- 860 3. Dropouts and adherence during the study. A number of dropouts are expected in  
861 any intervention or follow-up study. We have had this into account and the study is  
862 powered for 10% dropout rate. Nevertheless, in order to reduce participants' drop-  
863 out and to maintain adherence to the training program, several strategies will be  
864 used such as certificates, flexibility in the exercise program which will take into  
865 account private commitments, vacations, etc. small and training groups,  
866 personalized training and frequent face to face contact.

## 867 **6. FEASIBILITY AND CREDIBILITY OF THE PROJECT**

868 The feasibility and credibility of the project is warranted due to several factors:

- 869 1. The PI has proved over the last 11 years to be a very productive scientist with a  
870 large experience and capacity on exercise, physical fitness, obesity and metabolic  
871 disorders in children.
- 872 2. Additionally the PI has previously worked on cognitive performance (observational  
873 and intervention studies) and mental health outcomes, which all together cover  
874 most of the outcomes included in the present study.
- 875 3. Experimental psychologists will be involved in this project. They have a large  
876 experience and knowledge on epidemiological and intervention studies focused on  
877 executive function (a major cognitive dimension in this project) and neuroelectric  
878 and neuroimaging measures of brain function.
- 879 4. Infrastructure/facilities needed for this study are available and ready to be used. As  
880 described above, three Research Institutes newly developed and equipped will be  
881 involved in this project.
- 882 5. The applicant and collaborators have experience in assessing a large number of  
883 subjects in epidemiological studies. The sample seems reasonable based on our  
884 experience.

## 885 **7. SCIENTIFIC IMPACT OF THE STUDY**

### 886 **7.1. Scientific impact at a national and international level**

887 Brain is probably one of the most complex and unknown organs in human body. The  
888 understanding of the functioning and complexity of the brain is considered by many as  
889 one of the main challenges for the 21st century. Previous research was mainly done in  
890 animals, due to ethical and methodological issues. However, the latest advances in  
891 neuroelectric and neuroimaging technologies will lead to a new era of studies and  
892 knowledge. The project aims to be in the front line of the knowledge regarding  
893 cognition and brain. Exercise is an easily available and cheap medicine with multiple  
894 benefits, but little is still known about its effects on brain. The ActiveBrains project will  
895 explore the extent to what exercise is able to improve cognition and brain, at the same  
896 time that physical and mental outcomes. The combination of the selected primary and  
897 secondary outcomes included in this project will provide new insights on the  
898 multidimensional benefits of exercise on youth's health.

899 When evaluating the ActiveBrains project, it is important to keep in mind, that  
900 knowledge is dynamic, a particularly knowledge on human mind will be developed at a  
901 high speed since much is being invested on this topic internationally. A strength of the  
902 current project is that we will use one of the most advance magnetic resonance  
903 imaging device and will obtain top-quality raw data. When the time for analysis comes,  
904 data will be interpreted using the level of understanding about the brain available at  
905 that moment. This project will be early in this arena, and data can be re-analyzed in



906 the future when significant advancement are made in the understanding of brain and  
907 its functioning.

## 908 7.2. Impact on society

909 Mental performance and the increase of mental illness in children are of growing  
910 concern all around the world. In Europe, dysfunctional cognition/cognitive  
911 development (perception, memory, intelligence etc.), anxiety, attention deficit  
912 hyperactivity disorder, stress, depression and other mental disorders are estimated to  
913 affect around 35% of children, resulting in a reduced quality of life and additionally,  
914 significant cost impact on European Society through increased treatment and childcare  
915 costs. The current project would have impact on European society by providing novel  
916 information on the impact of exercise on brain. Ultimately, improved neuro-cognitive  
917 function and mental performance of the EU community should reduce the risk of  
918 common mental disorders and should increase education, productivity and economic  
919 growth.

920 We expect this project to have a high impact on societies, as previous research  
921 activities led by the PI have had. As an example, one of the first manuscripts  
922 published by the Dr. Ortega on fitness and cardiovascular health received a high  
923 attention from the Spanish media and got 3 research awards by the Spanish Society of  
924 Cardiology. Similarly, Dr. Ortega recently received the most prestigious award of the  
925 University of Granada to the scientific trajectory of young scientists, which is granted  
926 by the Social Council of the University illustrating relevance and impact of his research  
927 activity on society. Another example is his paper published as first author in the  
928 prestigious European Heart Journal. The manuscript got a massive media coverage and  
929 was published in more than 300 websites (BBC, CNN, etc.).

930

931

## 932 8. DISSEMINATION AND TRANSFERENCE OF FINDINGS

933

### 934 8.1. Dissemination plan

- 935 1. A major pillar of the dissemination plan is to keep a high scientific production in  
936 terms of high quality publications. The PI of this project has published more than  
937 190 scientific articles in the last years, being most of them published on top  
938 Journals of the field. To highlight is the 3 papers as first author in Journals with  
939 impact factor >10. This warrant that the funds invested on this project will be  
940 transform into scientific pieces that will reach all around the world.
- 941 2. Participation in major International meetings to present the project results.
- 942 3. In addition, we will organize one international scientific symposiums in Granada on  
943 exercise and cognition/brain in youth during the 2 years that last this project. The  
944 symposium will be organized close to the end of the project, to have an overall

945 discussion about the project achievements, as well as to get an update on other  
946 related research projects going on. It is important to share and exchange opinions  
947 with other top researchers in the field to achieve the research excellence. The  
948 University of Granada, the Regional Council for Research and some other entities in  
949 Spain support the organization of scientific events.

950 4. Another fresh and continuous source of dissemination of findings and news related  
951 with this project will be the design of a web-site for the project.

952 5. The University of Granada has a specific service for dissemination of research  
953 activities (<https://canal.ugr.es/ugrdivulga/>) that will be very useful to spread out  
954 news about relevant findings of this project. In this context, to mention that this  
955 applicant is use to deal with media and journalists, both through writing articles for  
956 understanding of laydown people and radio-interviews (Spanish and English  
957 speaking). As commented above, the manuscript published in the European Heart  
958 Journal has received more than 300 news on the online and printed  
959 newspapers/magazine (BBC, CNN, The Independent, etc; click on this link as an  
960 example: <http://www.bbc.co.uk/news/health-19474239>), plus a large number of  
961 phone interviews from all around the world.

## 962 8.2. Transference plan

963 The project team is planning to do three main transference activities to ensure that  
964 most relevant scientific material derived from this project reach the society,  
965 particularly non-specialists who do not often access to research information sources  
966 (e.g. Pubmed, Web of Sciences). They will be the target for these activities.

967 1. A first (and almost compulsory) step for increase the visibility of this project as well  
968 the transfer of knowledge to the society is the designing of a website. Some people  
969 believe that “What is not on the Net, does not exist”. The web domain will  
970 potentially be: <http://profith.ugr.es/activebrains?lang=en>; and as a principal page  
971 it will have a section of “Latest news”. We expect to use the web also as an  
972 informative tool. Overweight/obese children and/or their family might get to know  
973 about the project via the website. So, the web will provide with relevant  
974 information about the project and contact details to those families who are  
975 interested to participate in the project. In separate pages, the web will provide  
976 relevant information about the overall background and aim of the project,  
977 researcher involved, updated list of scientific publications, links with other related  
978 websites or projects.

979 2. As part of this project we plan to write an article for Wikipedia about exercise and  
980 cognition/brain in children  
981 ([http://en.wikipedia.org/wiki/Wikipedia:Contributing\\_to\\_Wikipedia](http://en.wikipedia.org/wiki/Wikipedia:Contributing_to_Wikipedia)). As indicated  
982 in Wikipedia website “Since its creation in 2001, Wikipedia has grown rapidly into  
983 one of the largest reference websites, attracting 470 million unique visitors  
984 monthly as of February 2012. There are more than 77,000 active contributors

985 working on over 22,000,000 articles in 285 languages. As of today, there are  
986 4,055,436 articles in English. Every day, hundreds of thousands of visitors from  
987 around the world collectively make tens of thousands of edits and create  
988 thousands of new articles to augment the knowledge held by the Wikipedia  
989 encyclopedia.” Without a shadow of a doubt, Wikipedia is at the moment one of  
990 the most powerful and reliable tools to share knowledge with society. We will  
991 make use of it as a major outreach activity.

992 3. Another powerful Internet Server is Youtube. We have previously used this  
993 multimedia online tool for scientific purposes. One of the main outcomes of the  
994 ALPHA project, a EU-funded study, was the evidence-based ALPHA fitness test  
995 battery available on the website of the project ([www.thealphaproject.net](http://www.thealphaproject.net)). One of  
996 the project deliverables was to create a DVD showing how to assess the different  
997 physical fitness tests in children and adolescents. Instead of burning DVDs and  
998 charge the interested people for them, we uploaded these videos on Youtube, so  
999 that everybody in the world has a quick and free access to them (see an example of  
1000 these videos: <http://www.youtube.com/watch?v=6cVUGoSbHFU&feature=g-hist>).  
1001 Likewise, we will use Youtube for uploading any visual information that needs to be  
1002 shared broadly with the public, such as commentaries on articles derived from the  
1003 projects interviews.

## 1004 9. REFERENCES

- 1005
- 1006 1. Rasberry CN, Lee SM, Robin L, Laris BA, Russell LA, Coyle KK, et al. The  
1007 association between school-based physical activity, including physical  
1008 education, and academic performance: a systematic review of the literature.  
1009 *Prev Med (Baltim)* [Internet]. 2011 Jun [cited 2014 Jul 10];52 Suppl 1:S10-20.  
1010 Available from: <http://www.ncbi.nlm.nih.gov/pubmed/21291905>
  - 1011 2. Khan NA, Hillman CH. The relation of childhood physical activity and aerobic  
1012 fitness to brain function and cognition: a review. *Pediatr Exerc Sci* [Internet].  
1013 2014 May [cited 2016 Apr 24];26(2):138–46. Available from:  
1014 <http://www.ncbi.nlm.nih.gov/pubmed/24722921>
  - 1015 3. Hillman CH, Kamijo K, Scudder M. A review of chronic and acute physical activity  
1016 participation on neuroelectric measures of brain health and cognition during  
1017 childhood. *Prev Med (Baltim)* [Internet]. 2011 Jun [cited 2015 Mar 29];52 Suppl  
1018 1:S21-8. Available from:  
1019 <http://www.pubmedcentral.nih.gov/articlerender.fcgi?artid=3094734&tool=pmcentrez&rendertype=abstract>
  - 1020 4. Hillman CH, Erickson KI, Kramer AF. Be smart, exercise your heart: exercise  
1021 effects on brain and cognition. *Nat Rev Neurosci* [Internet]. 2008 Jan [cited 2015  
1022 Jan 21];9(1):58–65. Available from:  
1023 <http://www.ncbi.nlm.nih.gov/pubmed/18094706>
  - 1024 5. Chaddock L, Pontifex MB, Hillman CH, Kramer AF. A review of the relation of  
1025 aerobic fitness and physical activity to brain structure and function in children. *J  
1026 Int Neuropsychol Soc* [Internet]. 2011 Nov [cited 2016 Apr 24];17(6):975–85.  
1027

1028 Available from: <http://www.ncbi.nlm.nih.gov/pubmed/22040896>

1029 6. Raine LB, Lee HK, Saliba BJ, Chaddock-Heyman L, Hillman CH, Kramer AF. The  
1030 influence of childhood aerobic fitness on learning and memory. *PLoS One*  
1031 [Internet]. 2013 Jan [cited 2015 Apr 10];8(9):e72666. Available from:  
1032 <http://www.pubmedcentral.nih.gov/articlerender.fcgi?artid=3770671&tool=pmcentrez&rendertype=abstract>

1033

1034 7. Chaddock L, Erickson KI, Prakash RS, Voss MW, VanPatter M, Pontifex MB, et al.  
1035 A functional MRI investigation of the association between childhood aerobic  
1036 fitness and neurocognitive control. *Biol Psychol*. 2012;89(1):260–8.

1037 8. Pontifex MB, Raine LB, Johnson CR, Chaddock L, Voss MW, Cohen NJ, et al.  
1038 Cardiorespiratory fitness and the flexible modulation of cognitive control in  
1039 preadolescent children. *J Cogn Neurosci* [Internet]. 2011 Jun [cited 2016 Oct  
1040 19];23(6):1332–45. Available from:  
1041 <http://www.mitpressjournals.org/doi/abs/10.1162/jocn.2010.21528>

1042 9. Chaddock L, Hillman CH, Pontifex MB, Johnson CR, Raine LB, Kramer AF.  
1043 Childhood aerobic fitness predicts cognitive performance one year later. *J Sports  
1044 Sci* [Internet]. 2012 Mar [cited 2016 Nov 1];30(5):421–30. Available from:  
1045 <http://www.tandfonline.com/doi/abs/10.1080/02640414.2011.647706>

1046 10. Monti JM, Hillman CH, Cohen NJ. Aerobic fitness enhances relational memory in  
1047 preadolescent children: the FITKids randomized control trial. *Hippocampus*  
1048 [Internet]. 2012 Sep [cited 2015 Apr 14];22(9):1876–82. Available from:  
1049 <http://www.pubmedcentral.nih.gov/articlerender.fcgi?artid=3404196&tool=pmcentrez&rendertype=abstract>

1050

1051 11. Kamijo K, Pontifex MB, O’Leary KC, Scudder MR, Wu C-T, Castelli DM, et al. The  
1052 effects of an afterschool physical activity program on working memory in  
1053 preadolescent children. *Dev Sci* [Internet]. 2011 Sep [cited 2015 Feb  
1054 26];14(5):1046–58. Available from:  
1055 <http://www.pubmedcentral.nih.gov/articlerender.fcgi?artid=3177170&tool=pmcentrez&rendertype=abstract>

1056

1057 12. Leckie RL, Oberlin LE, Voss MW, Prakash RS, Szabo-Reed A, Chaddock-Heyman L,  
1058 et al. BDNF mediates improvements in executive function following a 1-year  
1059 exercise intervention. *Front Hum Neurosci* [Internet]. 2014 Dec 11 [cited 2017  
1060 Sep 7];8:985. Available from:  
1061 <http://journal.frontiersin.org/article/10.3389/fnhum.2014.00985/abstract>

1062 13. Davis CL, Tomporowski PD, Mcdowell JE, Austin BP, Miller PH, Allison JD.  
1063 Exercise improves executive function and achievement and alters brain  
1064 activation in overweight children: A randomized controlled trial. *Heal Psychol*.  
1065 2011;30(1):91–8.

1066 14. Krafft CE, Schwarz NF, Chi L, Weinberger AL, Schaeffer DJ, Pierce JE, et al. An 8-  
1067 month randomized controlled exercise trial alters brain activation during  
1068 cognitive tasks in overweight children. *Obesity (Silver Spring)* [Internet]. 2014  
1069 Jan [cited 2018 Nov 1];22(1):232–42. Available from:  
1070 <http://www.ncbi.nlm.nih.gov/pubmed/23788510>

1071 15. Krafft CE, Pierce JE, Schwarz NF, Chi L, Weinberger AL, Schaeffer DJ, et al. An  
1072 eight month randomized controlled exercise intervention alters resting state  
1073 synchrony in overweight children. *Neuroscience* [Internet]. 2014 Jan 3 [cited  
1074 2014 Nov 3];256:445–55. Available from:

- 1075 <http://www.sciencedirect.com/science/article/pii/S0306452213008312>
- 1076 16. Ruiz JR, Ortega FB, Martínez-Gómez D, Labayen I, Moreno LA, De Bourdeaudhuij  
1077 I, et al. Objectively measured physical activity and sedentary time in European  
1078 adolescents: the HELENA study. *Am J Epidemiol* [Internet]. 2011 Jul 15 [cited  
1079 2014 Oct 6];174(2):173–84. Available from:  
1080 <http://www.ncbi.nlm.nih.gov/pubmed/21467152>
- 1081 17. Kanis JA, Burlet N, Cooper C, Delmas PD, Reginster J-Y, Borgstrom F, et al.  
1082 European guidance for the diagnosis and management of osteoporosis in  
1083 postmenopausal women. *Osteoporos Int* 2008 194 [Internet]. 2008 Feb 12  
1084 [cited 2021 Oct 10];19(4):399–428. Available from:  
1085 <https://link.springer.com/article/10.1007/s00198-008-0560-z>
- 1086 18. Rizzoli R, Bianchi ML, Garabédian M, McKay HA, Moreno LA. Maximizing bone  
1087 mineral mass gain during growth for the prevention of fractures in the  
1088 adolescents and the elderly. *Bone*. 2010 Feb 1;46(2):294–305.
- 1089 19. Cohen S, Janicki-Deverts D, Miller GE. Psychological Stress and Disease. *JAMA*  
1090 [Internet]. 2007 Oct 10 [cited 2021 Oct 10];298(14):1685–7. Available from:  
1091 <https://jamanetwork.com/journals/jama/fullarticle/209083>
- 1092 20. Norris R, Carroll D, Cochrane R. The effects of physical activity and exercise  
1093 training on psychological stress and well-being in an adolescent population. *J*  
1094 *Psychosom Res*. 1992 Jan 1;36(1):55–65.
- 1095 21. Sui X, Laditka JN, Church TS, Hardin JW, Chase N, Davis K, et al. Prospective  
1096 study of cardiorespiratory fitness and depressive symptoms in women and men.  
1097 *J Psychiatr Res* [Internet]. 2009 Feb [cited 2015 Apr 10];43(5):546–52. Available  
1098 from:  
1099 <http://www.pubmedcentral.nih.gov/articlerender.fcgi?artid=2683669&tool=pmcentrez&rendertype=abstract>
- 1100
- 1101 22. J K, T T, M K, P M, I M, A T, et al. Physical activity and fitness in adolescents at  
1102 risk for psychosis within the Northern Finland 1986 Birth Cohort. *Schizophr Res*  
1103 [Internet]. 2010 Feb [cited 2021 Oct 10];116(2–3):152–8. Available from:  
1104 <https://pubmed.ncbi.nlm.nih.gov/19942409/>
- 1105 23. HJ W, M B. Are there modifiable risk factors which will reduce the excess  
1106 mortality in schizophrenia? *J Psychopharmacol* [Internet]. 2010 [cited 2021 Oct  
1107 10];24(4 Suppl):37–50. Available from:  
1108 <https://pubmed.ncbi.nlm.nih.gov/20923919/>
- 1109 24. Beary M, Wildgust HJ. Cardiorespiratory fitness is an important risk factor. *BMJ*  
1110 [Internet]. 2011 Feb 22 [cited 2021 Oct 10];342(7795):455. Available from:  
1111 <https://www.bmj.com/content/342/bmj.d1152>
- 1112 25. Ardoy DN, Fernández-Rodríguez JM, Jiménez-Pavón D, Castillo R, Ruiz JR, Ortega  
1113 FB. A Physical Education trial improves adolescents’ cognitive performance and  
1114 academic achievement: the EDUFIT study. *Scand J Med Sci Sports* [Internet].  
1115 2014 Feb [cited 2014 Sep 17];24(1):e52–61. Available from:  
1116 <http://www.ncbi.nlm.nih.gov/pubmed/23826633>
- 1117 26. Castillo R, Ruiz JR, Chillón P, Jiménez-Pavón D, Esperanza-Díaz L, Moreno LA, et  
1118 al. Associations between parental educational/occupational levels and cognitive  
1119 performance in Spanish adolescents: the AVENA study - PubMed. *Psicothema*  
1120 [Internet]. 2011 [cited 2021 Oct 10];23:349–55. Available from:  
1121 <https://pubmed.ncbi.nlm.nih.gov/21774884/>

- 1122 27. Ortega F, Ruiz J, Castillo R, Chillón P, Labayen I, Martínez-Gómez D, et al. Sleep  
1123 duration and cognitive performance in adolescence. The AVENA study. *Acta*  
1124 *Pædiatrica* [Internet]. 2010 Mar 1 [cited 2021 Oct 10];99(3):454–6. Available  
1125 from: [https://onlinelibrary.wiley.com/doi/full/10.1111/j.1651-](https://onlinelibrary.wiley.com/doi/full/10.1111/j.1651-2227.2009.01618.x)  
1126 [2227.2009.01618.x](https://onlinelibrary.wiley.com/doi/full/10.1111/j.1651-2227.2009.01618.x)
- 1127 28. Ortega FB, Labayen I, Ruiz JR, Kurvinen E, Loit H-M, Harro J, et al. Improvements  
1128 in fitness reduce the risk of becoming overweight across puberty. *Med Sci*  
1129 *Sports Exerc* [Internet]. 2011 Oct [cited 2014 Oct 22];43(10):1891–7. Available  
1130 from: <http://www.ncbi.nlm.nih.gov/pubmed/21407124>
- 1131 29. Ortega FB, Ruiz JR, Hurtig-Wennlöf A, Meirhaeghe A, González-Gross M, Moreno  
1132 L a, et al. Physical activity attenuates the effect of low birth weight on insulin  
1133 resistance in adolescents: findings from two observational studies. *Diabetes*  
1134 [Internet]. 2011 Sep [cited 2014 Oct 22];60(9):2295–9. Available from:  
1135 [http://www.pubmedcentral.nih.gov/articlerender.fcgi?artid=3161315&tool=pm](http://www.pubmedcentral.nih.gov/articlerender.fcgi?artid=3161315&tool=pm-centrez&rendertype=abstract)  
1136 [centrez&rendertype=abstract](http://www.pubmedcentral.nih.gov/articlerender.fcgi?artid=3161315&tool=pm-centrez&rendertype=abstract)
- 1137 30. Ortega FB, Lee D-C, Katzmarzyk PT, Ruiz JR, Sui X, Church TS, et al. The intriguing  
1138 metabolically healthy but obese phenotype: cardiovascular prognosis and role  
1139 of fitness. *Eur Heart J* [Internet]. 2013 Feb [cited 2014 Oct 22];34(5):389–97.  
1140 Available from:  
1141 [http://www.pubmedcentral.nih.gov/articlerender.fcgi?artid=3561613&tool=pm](http://www.pubmedcentral.nih.gov/articlerender.fcgi?artid=3561613&tool=pm-centrez&rendertype=abstract)  
1142 [centrez&rendertype=abstract](http://www.pubmedcentral.nih.gov/articlerender.fcgi?artid=3561613&tool=pm-centrez&rendertype=abstract)
- 1143 31. Ortega FB, Lee D, Sui X, Kubzansky LD, Ruiz JR, Baruth M, et al. Psychological  
1144 well-being, cardiorespiratory fitness, and long-term survival. *Am J Prev Med*  
1145 [Internet]. 2010 Nov [cited 2014 Oct 22];39(5):440–8. Available from:  
1146 [http://www.pubmedcentral.nih.gov/articlerender.fcgi?artid=2962920&tool=pm](http://www.pubmedcentral.nih.gov/articlerender.fcgi?artid=2962920&tool=pm-centrez&rendertype=abstract)  
1147 [centrez&rendertype=abstract](http://www.pubmedcentral.nih.gov/articlerender.fcgi?artid=2962920&tool=pm-centrez&rendertype=abstract)
- 1148 32. Ortega FB, Silventoinen K, Tynelius P, Rasmussen F. Muscular strength in male  
1149 adolescents and premature death: cohort study of one million participants. *Br*  
1150 *Med J* [Internet]. 2012 [cited 2015 Mar 13];345:e7279. Available from:  
1151 <http://www.bmj.com/content/345/bmj.e7279>
- 1152 33. Kamijo K, Pontifex MB, Khan NA, Raine LB, Scudder MR, Drollette ES, et al. The  
1153 negative association of childhood obesity to cognitive control of action  
1154 monitoring. *Cereb Cortex* [Internet]. 2014 Mar 1 [cited 2017 Mar 4];24(3):654–  
1155 62. Available from: [https://academic.oup.com/cercor/article-](https://academic.oup.com/cercor/article-lookup/doi/10.1093/cercor/bhs349)  
1156 [lookup/doi/10.1093/cercor/bhs349](https://academic.oup.com/cercor/article-lookup/doi/10.1093/cercor/bhs349)
- 1157 34. Burkhalter TM, Hillman CH. A narrative review of physical activity, nutrition, and  
1158 obesity to cognition and scholastic performance across the human lifespan. *Adv*  
1159 *Nutr* [Internet]. 2011 Mar [cited 2015 Apr 10];2(2):201S–6S. Available from:  
1160 [http://www.pubmedcentral.nih.gov/articlerender.fcgi?artid=3065760&tool=pm](http://www.pubmedcentral.nih.gov/articlerender.fcgi?artid=3065760&tool=pm-centrez&rendertype=abstract)  
1161 [centrez&rendertype=abstract](http://www.pubmedcentral.nih.gov/articlerender.fcgi?artid=3065760&tool=pm-centrez&rendertype=abstract)
- 1162 35. Kamijo K, Khan NA, Pontifex MB, Scudder MR, Drollette ES, Raine LB, et al. The  
1163 relation of adiposity to cognitive control and scholastic achievement in  
1164 preadolescent children. *Obesity (Silver Spring)* [Internet]. 2012 Dec [cited 2015  
1165 Apr 11];20(12):2406–11. Available from:  
1166 [http://www.pubmedcentral.nih.gov/articlerender.fcgi?artid=3414677&tool=pm](http://www.pubmedcentral.nih.gov/articlerender.fcgi?artid=3414677&tool=pm-centrez&rendertype=abstract)  
1167 [centrez&rendertype=abstract](http://www.pubmedcentral.nih.gov/articlerender.fcgi?artid=3414677&tool=pm-centrez&rendertype=abstract)
- 1168 36. Chaddock L, Erickson KI, Prakash RS, Kim JS, Voss MW, Vanpatter M, et al. A

- 1169 neuroimaging investigation of the association between aerobic fitness,  
1170 hippocampal volume, and memory performance in preadolescent children.  
1171 *Brain Res* [Internet]. 2010 Oct 28 [cited 2017 Nov 28];1358:172–83. Available  
1172 from: <http://linkinghub.elsevier.com/retrieve/pii/S0006899310018317>
- 1173 37. Davis CL, Pollock NK, Waller JL, Allison JD, Dennis BA, Bassali R, et al. Exercise  
1174 dose and diabetes risk in overweight and obese children: a randomized  
1175 controlled trial. *JAMA* [Internet]. 2012 Sep 19 [cited 2016 Oct 20];308(11):1103–  
1176 12. Available from: <http://www.ncbi.nlm.nih.gov/pubmed/22990269>
- 1177 38. Cole TJ, Lobstein T. Extended international (IOTF) body mass index cut-offs for  
1178 thinness, overweight and obesity. *Pediatr Obes* [Internet]. 2012 Aug [cited 2014  
1179 Jul 19];7(4):284–94. Available from:  
1180 <http://www.ncbi.nlm.nih.gov/pubmed/22715120>
- 1181 39. Bervoets L, Massa G. Defining morbid obesity in children based on BMI 40 at age  
1182 18 using the extended international (IOTF) cut-offs. *Pediatr Obes* [Internet].  
1183 2014 Oct 1 [cited 2019 Feb 21];9(5):e94–8. Available from:  
1184 <http://doi.wiley.com/10.1111/j.2047-6310.2014.00217.x>
- 1185 40. Oldfield RC. The assessment and analysis of handedness: The Edinburgh  
1186 inventory. *Neuropsychologia* [Internet]. 1971 Mar 1 [cited 2018 Nov  
1187 14];9(1):97–113. Available from:  
1188 <https://www.sciencedirect.com/science/article/pii/0028393271900674>
- 1189 41. DuPaul GJ, Power TJ, Anastopoulos AD, Reid R. *ADHD rating scale IV: Checklists,*  
1190 *norms, and clinical interpretation.* New York: Guilford Press; 1998.
- 1191 42. Castelli DM, Hillman CH, Buck SM, Erwin HE. Physical fitness and academic  
1192 achievement in third- and fifth-grade students. *J Sport Exerc Psychol* [Internet].  
1193 2007 Apr [cited 2015 Mar 10];29(2):239–52. Available from:  
1194 <http://www.ncbi.nlm.nih.gov/pubmed/17568069>
- 1195 43. Castelli DM, Hillman CH, Hirsch J, Hirsch A, Drollette E. FIT Kids: Time in target  
1196 heart zone and cognitive performance. *Prev Med (Baltim)* [Internet]. 2011 Jun  
1197 [cited 2016 Jun 24];52 Suppl 1:S55–9. Available from:  
1198 <http://www.ncbi.nlm.nih.gov/pubmed/21281671>
- 1199 44. Esteban-Cornejo I, Cadenas-Sánchez C, Contreras-Rodriguez O, Verdejo-Roman  
1200 J, Mora-Gonzalez J, Migueles JH, et al. A whole brain volumetric approach in  
1201 overweight/obese children: Examining the association with different physical  
1202 fitness components and academic performance. *The ActiveBrains project.*  
1203 *Neuroimage* [Internet]. 2017 Aug [cited 2017 Aug 9];159:346–54. Available  
1204 from: <http://linkinghub.elsevier.com/retrieve/pii/S1053811917306584>
- 1205 45. Esteban-Cornejo I, Mora-Gonzalez J, Cadenas-Sanchez C, Contreras-Rodriguez O,  
1206 Verdejo-Román J, Henriksson P, et al. Fitness, cortical thickness and surface area  
1207 in overweight/obese children: The mediating role of body composition and  
1208 relationship with intelligence. *Neuroimage* [Internet]. 2019 Feb 1 [cited 2018  
1209 Dec 6];186:771–81. Available from:  
1210 <https://www.sciencedirect.com/science/article/pii/S1053811918321281?via%3Dihub>  
1211
- 1212 46. Polich J. Updating P300: An integrative theory of P3a and P3b. *Clin Neurophysiol*  
1213 [Internet]. 2007 Oct [cited 2018 Nov 1];118(10):2128–48. Available from:  
1214 <http://www.ncbi.nlm.nih.gov/pubmed/17573239>
- 1215 47. Kaufman A, Kaufman N. *Kaufman Brief Intelligence Test.* Madrid: Tea; 2000.

- 1216 48. Delis D, Kaplan E, Kramer J. Delis-Kaplan executive function system (D-KEFS). San  
1217 Antonio, TX: The Psychological Corporation; 2001.
- 1218 49. Homack S, Lee D, Riccio CA. Test review: Delis-Kaplan executive function system.  
1219 J Clin Exp Neuropsychol [Internet]. 2005 Jul [cited 2016 Apr 28];27(5):599–609.  
1220 Available from: <http://www.ncbi.nlm.nih.gov/pubmed/16019636>
- 1221 50. Swanson J. The Delis-Kaplan Executive Function System: A Review. Can J Sch  
1222 Psychol [Internet]. 2005 Dec 1 [cited 2016 Oct 20];20(1–2):117–28. Available  
1223 from: <http://cjs.sagepub.com/cgi/doi/10.1177/0829573506295469>
- 1224 51. Moreno-López L, Soriano-Mas C, Delgado-Rico E, Rio-Valle JS, Verdejo-García A.  
1225 Brain Structural Correlates of Reward Sensitivity and Impulsivity in Adolescents  
1226 with Normal and Excess Weight. PLoS One. 2012;7(11):e49185.
- 1227 52. Sánchez-Cubillo I, Periañez JA, Adrover-Roig D, Rodríguez-Sánchez JM, Ríos-Lago  
1228 M, Tirapu J, et al. Construct validity of the Trail Making Test: Role of task-  
1229 switching, working memory, inhibition/interference control, and visuomotor  
1230 abilities. J Int Neuropsychol Soc [Internet]. 2009 May 30 [cited 2016 Jul  
1231 25];15(3):438. Available from:  
1232 [http://www.journals.cambridge.org/abstract\\_S1355617709090626](http://www.journals.cambridge.org/abstract_S1355617709090626)
- 1233 53. McGrew K, Woodcock R. Woodcock-Johnson III: Technical Manual. Itasca, IL:  
1234 Riverside Publishing Company; 2001.
- 1235 54. Noakes T, Spedding M. Olympics: Run for your life. Nature [Internet]. 2012 Jul  
1236 18 [cited 2017 Nov 25];487(7407):295–6. Available from:  
1237 <http://www.ncbi.nlm.nih.gov/pubmed/22810678>
- 1238 55. Szuhany KL, Bugatti M, Otto MW. A meta-analytic review of the effects of  
1239 exercise on brain-derived neurotrophic factor. J Psychiatr Res [Internet]. 2015  
1240 Jan [cited 2017 Nov 25];60:56–64. Available from:  
1241 <http://linkinghub.elsevier.com/retrieve/pii/S0022395614002933>
- 1242 56. Huang T, Larsen KT, Ried-Larsen M, Møller NC, Andersen LB. The effects of  
1243 physical activity and exercise on brain-derived neurotrophic factor in healthy  
1244 humans: A review. Scand J Med Sci Sports [Internet]. 2014 Feb [cited 2017 Nov  
1245 25];24(1):1–10. Available from: <http://doi.wiley.com/10.1111/sms.12069>
- 1246 57. Ruiz JR, Castro-Piñero J, España-Romero V, Artero EG, Ortega FB, Cuenca MM, et  
1247 al. Field-based fitness assessment in young people: The ALPHA health-related  
1248 fitness test battery for children and adolescents. Br J Sports Med.  
1249 2011;45(6):518–24.
- 1250 58. RR S, RJ R, FL G, N O. Validation of the Omni Scale of Perceived Exertion in a  
1251 sample of Spanish-speaking youth from the USA. Percept Mot Skills [Internet].  
1252 2008 Aug [cited 2021 Oct 11];107(1):181–8. Available from:  
1253 <https://pubmed.ncbi.nlm.nih.gov/18986045/>
- 1254 59. H T, KD M, DR S. Age-predicted maximal heart rate revisited. J Am Coll Cardiol  
1255 [Internet]. 2001 [cited 2021 Oct 11];37(1):153–6. Available from:  
1256 <https://pubmed.ncbi.nlm.nih.gov/11153730/>
- 1257 60. Shaibi GQ, Cruz ML, Ball GDC, Weigensberg MJ, Salem GJ, Crespo NC, et al.  
1258 Effects of resistance training on insulin sensitivity in overweight Latino  
1259 adolescent males. Med Sci Sports Exerc [Internet]. 2006 Jul [cited 2021 Oct  
1260 11];38(7):1208–15. Available from: [https://journals.lww.com/acsm-  
1261 msse/Fulltext/2006/07000/Effects\\_of\\_Resistance\\_Training\\_on\\_Insulin.3.aspx](https://journals.lww.com/acsm-msse/Fulltext/2006/07000/Effects_of_Resistance_Training_on_Insulin.3.aspx)
- 1262 61. Davis JN, Gyllenhammer LE, Vanni AA, Meija M, Tung A, Schroeder ET, et al.



- 1263 Startup circuit training program reduces metabolic risk in latino adolescents.  
1264 Med Sci Sports Exerc [Internet]. 2011 [cited 2021 Oct 11];43(11):2195–203.  
1265 Available from: [https://journals.lww.com/acsm-  
1266 msse/Fulltext/2011/11000/Startup\\_Circuit\\_Training\\_Program\\_Reduces\\_Metab  
1267 olic.23.aspx](https://journals.lww.com/acsm-msse/Fulltext/2011/11000/Startup_Circuit_Training_Program_Reduces_Metabolic.23.aspx)
- 1268 62. Davis JN, Ventura EE, Tung A, Munevar MA, Hasson RE, Byrd-Williams C, et al.  
1269 Effects of a randomized maintenance intervention on adiposity and metabolic  
1270 risk factors in overweight minority adolescents. *Pediatr Obes* [Internet]. 2012  
1271 Feb 1 [cited 2021 Oct 11];7(1):16–27. Available from:  
1272 <https://onlinelibrary.wiley.com/doi/full/10.1111/j.2047-6310.2011.00002.x>
- 1273 63. Faigenbaum A, Milliken L, Wescott W. Maximal strength testing in healthy  
1274 children. *J Strength Cond Res* [Internet]. 2003 [cited 2021 Oct 11];17(1):162–6.  
1275 Available from: <https://pubmed.ncbi.nlm.nih.gov/12580672/>
- 1276 64. Robertson RJ, Goss FL, Andreacci JL, Dubé JJ, Rutkowski JJ, Frazee KM, et al.  
1277 Validation of the children’s OMNI-resistance exercise scale of perceived  
1278 exertion. *Med Sci Sports Exerc* [Internet]. 2005 May [cited 2021 Oct  
1279 10];37(5):819–26. Available from: [https://journals.lww.com/acsm-  
1280 msse/Fulltext/2005/05000/Validation\\_of\\_the\\_Children\\_s\\_OMNI\\_Resistance.16.  
1281 aspx](https://journals.lww.com/acsm-msse/Fulltext/2005/05000/Validation_of_the_Children_s_OMNI_Resistance.16.aspx)
- 1282 65. Ortega FB, Ruiz JR, España-Romero V, Vicente-Rodriguez G, Martínez-Gómez D,  
1283 Manios Y, et al. The International Fitness Scale (IFIS): usefulness of self-reported  
1284 fitness in youth. *Int J Epidemiol* [Internet]. 2011 Jun [cited 2016 Mar  
1285 10];40(3):701–11. Available from:  
1286 <http://www.ncbi.nlm.nih.gov/pubmed/21441238>
- 1287 66. Sánchez-López M, Martínez-Vizcaíno V, García-Hermoso A, Jiménez-Pavón D,  
1288 Ortega FB. Construct validity and test-retest reliability of the International  
1289 Fitness Scale (IFIS) in Spanish children aged 9-12 years. *Scand J Med Sci Sports*  
1290 [Internet]. 2015 Aug [cited 2016 Mar 10];25(4):543–51. Available from:  
1291 <http://www.ncbi.nlm.nih.gov/pubmed/24942050>
- 1292 67. Saint-Maurice PF, Welk GJ. Web-based assessments of physical activity in youth:  
1293 considerations for design and scale calibration. *J Med Internet Res* [Internet].  
1294 2014 Jan 1 [cited 2015 May 11];16(12):e269. Available from:  
1295 <http://www.jmir.org/2014/12/e269/>
- 1296 68. Malina RM, Rogol AD, Cumming SP, Coelho e Silva MJ, Figueiredo AJ. Biological  
1297 maturation of youth athletes: Assessment and implications. *Br J Sports Med*  
1298 [Internet]. 2015 Jul [cited 2016 Jun 19];49(13):852–9. Available from:  
1299 <http://www.ncbi.nlm.nih.gov/pubmed/26084525>
- 1300 69. Moore SA, McKay HA, Macdonald H, Nettlefold L, Baxter-Jones ADG, Cameron  
1301 N, et al. Enhancing a somatic maturity prediction model. *Med Sci Sport Exerc*  
1302 [Internet]. 2015 Aug [cited 2018 Mar 13];47(8):1755–64. Available from:  
1303 <http://www.ncbi.nlm.nih.gov/pubmed/25423445>
- 1304 70. Gracia-Marco L, Moreno LA, Ortega FB, León F, Sioen I, Kafatos A, et al. Levels of  
1305 Physical Activity That Predict Optimal Bone Mass in Adolescents: The HELENA  
1306 Study. *Am J Prev Med* [Internet]. 2011 Jun 1 [cited 2021 Oct 10];40(6):599–607.  
1307 Available from:  
1308 <http://www.ajpmonline.org/article/S074937971100184X/fulltext>
- 1309 71. Gracia-Marco L, Ortega FB, Jiménez-Pavón D, Rodríguez G, Castillo MJ, Vicente-

- 1310 Rodríguez G, et al. Adiposity and bone health in Spanish adolescents. The  
 1311 HELENA study. *Osteoporos Int* 2011 233 [Internet]. 2011 May 12 [cited 2021 Oct  
 1312 10];23(3):937–47. Available from:  
 1313 <https://link.springer.com/article/10.1007/s00198-011-1649-3>
- 1314 72. Trianes Torres MV, Blanca Mena MJ, Fernández Baena FJ, Escobar Espejo M,  
 1315 Maldonado Montero EF, Muñoz Sánchez AM. [Assessment of stress in  
 1316 childhood: Children’s Daily Stress Inventory (Inventario Infantil de Estresores  
 1317 Cotidiano, IIEC)]. *Psicothema* [Internet]. 2009 Nov [cited 2015 May  
 1318 11];21(4):598–603. Available from:  
 1319 <http://www.ncbi.nlm.nih.gov/pubmed/19861105>
- 1320 73. Thayer JF, Ahs F, Fredrikson M, Sollers 3rd JJ, Wager TD, Sollers JJ. A meta-  
 1321 analysis of heart rate variability and neuroimaging studies: implications for heart  
 1322 rate variability as a marker of stress and health. *Neurosci Biobehav Rev*.  
 1323 2011/12/20. 2012 Feb;36(2):747–56.
- 1324 74. Gamelin F-X, Baquet G, Berthoin S, Bosquet L. Validity of the Polar S810 to  
 1325 Measure R-R Intervals in Children. *Int J Sports Med* [Internet]. 2007 Jul 5 [cited  
 1326 2021 Oct 11];29(2):134–8. Available from: [http://www.thieme-  
 1327 connect.de/products/ejournals/html/10.1055/s-2007-964995](http://www.thieme-connect.de/products/ejournals/html/10.1055/s-2007-964995)
- 1328 75. Rodrigo G, Lusiardo M. Spanish Version of the Revised Children’s Manifest  
 1329 Anxiety Scale in Uruguay: Reliability and Concurrent Validity. *Psychol Rep*  
 1330 [Internet]. 1989 Aug 1 [cited 2019 Mar 7];65(1):94–94. Available from:  
 1331 <http://journals.sagepub.com/doi/10.2466/pr0.1989.65.1.94>
- 1332 76. Kovacs M. Children’s depression inventory (CDI). 2003 [cited 2021 Oct 10];  
 1333 Available from: [https://jyosilpsycho-hub.com/psychological-test/children-  
 1334 depression-inventory-cdi](https://jyosilpsycho-hub.com/psychological-test/children-depression-inventory-cdi)
- 1335 77. Martínez I, Musitu G, Garcia JF, Camino L. Un análisis intercultural de los efectos  
 1336 de la socialización familiar en el autoconcepto: España y Brasil. [A cross-cultural  
 1337 analysis of the effects of family socialization on self-concept: Spain and Brazil.].  
 1338 *Psicol Educ e Cult*. 2003;7(2):239–59.
- 1339 78. H T, SJ P. Development of the Children’s Body Image Scale. *Br J Clin Psychol*  
 1340 [Internet]. 2002 [cited 2021 Oct 10];41(Pt 2):185–203. Available from:  
 1341 <https://pubmed.ncbi.nlm.nih.gov/12034005/>
- 1342 79. H T, SJ P. The Children’s Body Image Scale: reliability and use with international  
 1343 standards for body mass index. *Br J Clin Psychol* [Internet]. 2008 Mar [cited 2021  
 1344 Oct 10];47(Pt 1):119–24. Available from:  
 1345 <https://pubmed.ncbi.nlm.nih.gov/17971282/>
- 1346 80. Baessler J, Schwarzer R. Evaluación de la autoeficacia: adaptación española de la  
 1347 Escala de Autoeficacia general [Measuring optimistic self-beliefs: A Spanish  
 1348 adaptation of the General Self-Efficacy Scale]. *Ansiedad y Estrés*. 1996;2(1):1–8.
- 1349 81. Rosenberg M. *Society and the adolescent self-image* (rev. ed.).
- 1350 82. Mäkinen M, Lindberg N, Komulainen E, Puukko-Viertomies L-R, Aalberg V,  
 1351 Marttunen M. Psychological well-being in adolescents with excess weight.  
 1352 <http://dx.doi.org/10.3109/080394882014986194> [Internet]. 2015 Jul 1 [cited  
 1353 2021 Oct 11];69(5):354–63. Available from:  
 1354 <https://www.tandfonline.com/doi/abs/10.3109/08039488.2014.986194>
- 1355 83. Fagg J, Chadwick P, Cole TJ, Cummins S, Goldstein H, Lewis H, et al. From trial to  
 1356 population: a study of a family-based community intervention for childhood

- 1357 overweight implemented at scale. *Int J Obes* 2014 3810 [Internet]. 2014 Jun 12  
 1358 [cited 2021 Oct 11];38(10):1343–9. Available from:  
 1359 <https://www.nature.com/articles/ijo2014103>
- 1360 84. Sandín B. Escala PANAS de afecto positivo y negativo para niños y adolescentes  
 1361 (PANASN) [Internet]. Vol. 8, *Revista de psicopatología y psicología clínica*.  
 1362 Universidad Nacional de Educación a Distancia, UNED; 2003 [cited 2015 May  
 1363 12]. p. 173–82. Available from:  
 1364 <http://dialnet.unirioja.es/servlet/articulo?codigo=722206>
- 1365 85. Laurent J, Catanzaro SJ, Joiner TE, Rudolph KD, Potter KI, Lambert S, et al. A  
 1366 measure of positive and negative affect for children: Scale development and  
 1367 preliminary validation. *Psychol Assess* [Internet]. 1999 [cited 2019 Mar  
 1368 7];11(3):326–38. Available from:  
 1369 <http://doi.apa.org/getdoi.cfm?doi=10.1037/1040-3590.11.3.326>
- 1370 86. Lyubomirsky S, Lepper HS. A Measure of Subjective Happiness: Preliminary  
 1371 Reliability and Construct Validation. *Soc Indic Res* 1999 462 [Internet]. 1999  
 1372 [cited 2021 Oct 10];46(2):137–55. Available from:  
 1373 <https://link.springer.com/article/10.1023/A:1006824100041>
- 1374 87. Extremera N, Fernández-Berrocal P. The Subjective Happiness Scale: Translation  
 1375 and Preliminary Psychometric Evaluation of a Spanish Version. *Soc Indic Res*  
 1376 2013 1191 [Internet]. 2013 Nov 7 [cited 2021 Oct 10];119(1):473–81. Available  
 1377 from: <https://link.springer.com/article/10.1007/s11205-013-0497-2>
- 1378 88. MF S, CS C, MW B. Distinguishing optimism from neuroticism (and trait anxiety,  
 1379 self-mastery, and self-esteem): a reevaluation of the Life Orientation Test. *J Pers  
 1380 Soc Psychol* [Internet]. 1994 [cited 2021 Oct 10];67(6):1063–78. Available from:  
 1381 <https://pubmed.ncbi.nlm.nih.gov/7815302/>
- 1382 89. D M, P S, A G. Brief report: Assessing dispositional optimism in adolescence--  
 1383 factor structure and concurrent validity of the Life Orientation Test--Revised. *J  
 1384 Adolesc* [Internet]. 2014 Feb [cited 2021 Oct 10];37(2):97–101. Available from:  
 1385 <https://pubmed.ncbi.nlm.nih.gov/24439615/>
- 1386 90. Moreno-Murcia JA, Martínez-Galindo MC, Pérez LMR, Coll VG, Martín-Albo J.  
 1387 Validation of the Spanish version of the children's self-perceptions of adequacy  
 1388 in and predilection for physical activity (CSAPPA) questionnaire. *Psychol Soc  
 1389 Educ* [Internet]. 2011 Apr 27 [cited 2021 Oct 11];3(2):113–32. Available from:  
 1390 <http://ojs.ual.es/ojs/index.php/psye/article/view/474>
- 1391 91. Stevens K. Developing a descriptive system for a new preference-based measure  
 1392 of health-related quality of life for children. *Qual Life Res* 2009 188 [Internet].  
 1393 2009 Aug 20 [cited 2021 Oct 11];18(8):1105–13. Available from:  
 1394 <https://link.springer.com/article/10.1007/s11136-009-9524-9>
- 1395 92. Stevens K. Assessing the performance of a new generic measure of health-  
 1396 related quality of life for children and refining it for use in health state valuation.  
 1397 *Appl Heal Econ Heal Policy* 2011 93 [Internet]. 2012 Aug 6 [cited 2021 Oct  
 1398 11];9(3):157–69. Available from:  
 1399 <https://link.springer.com/article/10.2165/11587350-000000000-00000>
- 1400 93. Chen G, Stevens K, Rowen D, Ratcliffe J. From KIDSCREEN-10 to CHU9D: creating  
 1401 a unique mapping algorithm for application in economic evaluation. *Heal Qual  
 1402 Life Outcomes* 2014 121 [Internet]. 2014 Aug 29 [cited 2021 Oct 11];12(1):1–11.  
 1403 Available from: <https://hqlo.biomedcentral.com/articles/10.1186/s12955-014->

- 1404 0134-z
- 1405 94. Tomás Vila M, Miralles Torres A, Beseler Soto B. Versión española del Pediatric  
1406 Sleep Questionnaire. Un instrumento útil en la investigación de los trastornos  
1407 del sueño en la infancia. *Análisis de su fiabilidad. An Pediatría*. 2007 Feb  
1408 1;66(2):121–8.
- 1409 95. MB L, PJ R. Measurement of dietary intake in children. *Proc Nutr Soc* [Internet].  
1410 2000 [cited 2021 Oct 11];59(2):279–93. Available from:  
1411 <https://pubmed.ncbi.nlm.nih.gov/10946797/>
- 1412 96. Burrows TL, Martin RJ, Collins CE. A Systematic Review of the Validity of Dietary  
1413 Assessment Methods in Children when Compared with the Method of Doubly  
1414 Labeled Water. *J Am Diet Assoc* [Internet]. 2010 Oct 1 [cited 2021 Oct  
1415 11];110(10):1501–10. Available from:  
1416 <http://jandonline.org/article/S0002822310011879/fulltext>
- 1417 97. Huybrechts I, Backer G De, Bacquer D De, Maes L, Henauw S De. Relative  
1418 Validity and Reproducibility of a Food-Frequency Questionnaire for Estimating  
1419 Food Intakes among Flemish Preschoolers. *Int J Environ Res Public Heal* 2009,  
1420 Vol 6, Pages 382-399 [Internet]. 2009 Jan 22 [cited 2021 Oct 11];6(1):382–99.  
1421 Available from: <https://www.mdpi.com/1660-4601/6/1/382/htm>
- 1422 98. Papadaki S, Mavrikaki E. Greek adolescents and the Mediterranean diet: factors  
1423 affecting quality and adherence. *Nutrition*. 2015 Feb 1;31(2):345–9.
- 1424 99. Jiménez Pavón D, Ortega FP, Ruiz JR, España Romero V, García Artero E, Moliner  
1425 Urdiales D, et al. Socioeconomic status influences physical fitness in European  
1426 adolescents independently of body fat and physical activity: the HELENA study.  
1427 *Nutr Hosp* [Internet]. 2010 [cited 2016 Apr 13];25(2):311–6. Available from:  
1428 <http://www.ncbi.nlm.nih.gov/pubmed/20449543>
- 1429 100. Yuan Y. Multiple Imputation Using SAS Software. *J Stat Softw* [Internet]. 2011  
1430 Dec 12 [cited 2018 Nov 14];45(6):1–25. Available from:  
1431 <http://www.jstatsoft.org/v45/i06/>
- 1432 101. Sink KM, Espeland MA, Castro CM, Church T, Cohen R, Dodson JA, et al. Effect of  
1433 a 24-month physical activity intervention vs health education on cognitive  
1434 outcomes in sedentary older adults. *JAMA* [Internet]. 2015 Aug 25 [cited 2018  
1435 Jan 25];314(8):781. Available from:  
1436 <http://www.ncbi.nlm.nih.gov/pubmed/26305648>
- 1437 102. Benjamini Y, Hochberg Y. Controlling the false discovery rate: A practical and  
1438 powerful approach to multiple testing. *J R Stat Soc Ser B*. 1995;57(1):289–300.  
1439
