# Supplementary material for: Effects of an Exercise Program on Cardiometabolic and Mental Health in Children With Overweight or Obesity: A Secondary Analysis of a Randomized Clinical Trial
Source: PubMed Central journal article supplement (PMC10375312; doi:10.1001/jamanetworkopen.2023.24839), 2023-07-27
Supplement: jamanetwopen-e2324839-s002.pdf [file jamanetwopen-e2324839-s002.pdf]

## Supplementary Online Content

Migueles JH, Cadenas-Sanchez C, Lubans DR, et al. Effects of an exercise program on cardiometabolic and mental health in children with overweight or obesity: a secondary analysis of a randomized clinical trial. *JAMA Netw Open*. 2023;6(7):e2324839. doi:10.1001/jamanetworkopen.2023.24839

**eTable 1.** Descriptive Characteristics of the ActiveBrains Participants Meeting the Per-Protocol Criteria at Baseline

**eTable 2.** Descriptive Characteristics of the ActiveBrains Adherent and Nonadherent Participants at Baseline

**eTable 3.** Effects of the ActiveBrains Exercise Program on Cardiometabolic Health (Per-Protocol Analyses)

**eTable 4.** Effects of the ActiveBrains Exercise Program on Cardiometabolic Health (Intention-to-Treat Analyses)

**eTable 5.** Effects of the ActiveBrains Exercise Program on Mental Health (Per-Protocol Analyses)

**eTable 6.** Effects of the ActiveBrains Exercise Program on Mental Health (Intention-to-Treat Analyses)

**eFigure 1.** Individual Change Distribution in the Cardiometabolic Risk Scores, Visceral Adipose Tissue, and Body Mass Index Affected by the Exercise Program

**eFigure 2.** Change in Daily Activity Composition Induced by the Exercise Program as Measured With Hip- and Wrist-Worn Accelerometers

This supplementary material has been provided by the authors to give readers additional information about their work.

**eTable 1.** Descriptive characteristics of the ActiveBrains participants meeting the per-protocol criteria at baseline.

|                                        | All |                | Control group |                | Exercise group |                |
|----------------------------------------|-----|----------------|---------------|----------------|----------------|----------------|
|                                        | N   | Mean (SD) or % | N             | Mean (SD) or % | N              | Mean (SD) or % |
| <i>Sex</i>                             |     |                |               |                |                |                |
| Girls (n %)                            | 41  | 41%            | 25            | 48%            | 16             | 39%            |
| Boys (n %)                             | 58  | 59%            | 27            | 52%            | 31             | 76%            |
| At risk of dyslipidemia (n %)          | 43  | 44%            | 27            | 52%            | 16             | 28%            |
| Pre-diabetes (n %)                     | 3   | 3%             | 0             | 0%             | 3              | 6%             |
| Pre-hypertension (n %)                 | 10  | 10%            | 5             | 10%            | 5              | 9%             |
| Unfit (n %)                            | 62  | 63%            | 32            | 62%            | 30             | 53%            |
| At risk of metabolic syndrome (n %)    | 25  | 25%            | 7             | 13%            | 18             | 38%            |
| At risk of anxiety (n %)               | 18  | 19%            | 11            | 22%            | 7              | 16%            |
| At risk of depression (n %)            | 3   | 3%             | 1             | 2%             | 2              | 4%             |
| Age (y)                                | 99  | 10.0 (1.1)     | 51            | 10.1 (1.1)     | 47             | 10.0 (1.1)     |
| Peak height velocity (y)               | 99  | -2.2 (1.0)     | 51            | -2.1 (1.1)     | 47             | -2.4 (0.9)     |
| <i>Cardiometaabolic health</i>         |     |                |               |                |                |                |
| LDL (mg/dL)                            | 86  | 100.7 (24.63)  | 45            | 102.4 (24.55)  | 41             | 98.9 (24.90)   |
| HDL (mg/dL)                            | 95  | 51.0 (11.05)   | 50            | 49.7 (10.54)   | 45             | 52.4 (11.54)   |
| Triglycerides (mg/dL)                  | 95  | 95.8 (46.09)   | 50            | 99.0 (48.86)   | 45             | 92.2 (43.06)   |
| Triglycerides-to-HDL (mg/dL)           | 95  | 2.1 (1.63)     | 50            | 2.2 (1.53)     | 45             | 2.0 (1.75)     |
| Insulin (mg/dL)                        | 90  | 13.5 (8.72)    | 47            | 13.2 (8.67)    | 43             | 13.7 (8.86)    |
| Glucose (mg/dL)                        | 96  | 86.3 (6.90)    | 50            | 84.7 (6.53)    | 46             | 88.0 (6.97)    |
| HOMA                                   | 89  | 2.9 (1.99)     | 46            | 2.8 (1.94)     | 43             | 3.0 (2.05)     |
| Systolic blood pressure (mmHG)         | 97  | 100.5 (13.66)  | 50            | 100.1 (14.10)  | 47             | 101.1 (13.31)  |
| Diastolic blood pressure (mmHG)        | 97  | 57.2 (13.66)   | 50            | 56.5 (14.38)   | 47             | 58.0 (12.97)   |
| Body mass index (kg/m <sup>2</sup> )   | 99  | 26.8 (3.56)    | 52            | 26.3 (2.97)    | 47             | 27.4 (4.07)    |
| Body mass index (WHO z-score)          | 99  | 3.0 (0.87)     | 52            | 2.9 (0.88)     | 47             | 3.1 (0.87)     |
| Fat mass index (kg/m <sup>2</sup> )    | 98  | 11.8 (2.82)    | 51            | 11.3 (2.28)    | 47             | 12.4 (3.24)    |
| Lean mass index (kg/m <sup>2</sup> )   | 98  | 13.9 (1.48)    | 51            | 13.9 (1.40)    | 47             | 14.0 (1.57)    |
| Waist circumference (cm)               | 99  | 90.5 (9.77)    | 52            | 89.7 (8.50)    | 47             | 91.3 (11.03)   |
| Visceral adipose tissue (g)            | 80  | 402.1 (114.15) | 42            | 390.4 (104.61) | 38             | 415.1 (123.95) |
| CRF performance (laps)                 | 97  | 15.6 (7.12)    | 50            | 16.1 (7.38)    | 47             | 15.0 (6.86)    |
| CRF (VO <sub>2</sub> max, ml/kg/min)   | 97  | 40.6 (2.65)    | 50            | 40.7 (2.33)    | 47             | 40.4 (2.98)    |
| Speed-agility fitness (s)              | 97  | 15.1 (1.57)    | 50            | 15.0 (1.66)    | 47             | 15.3 (1.47)    |
| Upper-limb muscular strength (kg)      | 98  | 16.9 (4.25)    | 51            | 17.1 (4.05)    | 47             | 16.7 (4.49)    |
| Lower-limb muscular strength (cm)      | 97  | 104.4 (18.10)  | 50            | 106.3 (19.04)  | 47             | 102.3 (17.00)  |
| <i>Children-reported mental health</i> |     |                |               |                |                |                |
| Stress (0 – 30)*                       | 96  | 5.8 (3.29)     | 50            | 6.2 (3.16)     | 46             | 5.4 (3.41)     |
| Anxiety (20 – 60)*                     | 95  | 33.6 (7.29)    | 50            | 34.1 (7.10)    | 45             | 33.0 (7.54)    |
| Depression (0 – 54)*                   | 96  | 8.4 (5.12)     | 50            | 9.0 (5.31)     | 46             | 7.8 (4.88)     |
| Negative affect (10 – 30)*             | 95  | 16.0 (3.51)    | 50            | 16.3 (3.58)    | 45             | 15.7 (3.46)    |
| Positive affect (10 – 30)*             | 97  | 24.4 (2.97)    | 51            | 24.5 (2.97)    | 46             | 24.3 (2.99)    |
| Happiness (4 – 28)*                    | 99  | 22.7 (3.92)    | 52            | 22.4 (3.72)    | 47             | 23.1 (4.14)    |
| Optimism (6 – 30)*                     | 98  | 22.0 (4.04)    | 51            | 22.1 (4.23)    | 47             | 22.0 (3.88)    |
| Self-efficacy (10 – 40)*               | 98  | 30.9 (4.92)    | 51            | 30.5 (5.36)    | 47             | 31.3 (4.41)    |
| Self-concept (30 – 300)*               | 97  | 227.1 (28.88)  | 50            | 225.4 (29.86)  | 47             | 228.8 (28.02)  |
| Self-esteem (10 – 40)*                 | 98  | 33.0 (4.69)    | 51            | 32.6 (4.51)    | 47             | 33.3 (4.91)    |

Data analyses were primarily conducted under the per-protocol principle, i.e., attending 70% of the sessions or keep the usual lifestyle for exercise and control groups, respectively.

\*Score range for the questionnaire.

LDL: low-density lipoprotein; HDL: high-density lipoprotein; HOMA: homeostatic model assessment; CRF: cardiorespiratory fitness; VO<sub>2</sub>max: maximum oxygen consumption, WHO: World Health Organization.

**eTable 2.** Descriptive Characteristics of the ActiveBrains Adherent and Nonadherent Participants at Baseline

|                                           | Included |                | Dropouts |                | <i>P</i> |
|-------------------------------------------|----------|----------------|----------|----------------|----------|
|                                           | N        | Mean (SD) or % | N        | Mean (SD) or % |          |
| <i>Sex</i>                                |          |                |          |                | 0.427    |
| Girls (n %)                               | 36       | 39%            | 9        | 53%            |          |
| Boys (n %)                                | 56       | 61%            | 8        | 47%            |          |
| <i>Maternal education level</i>           |          |                |          |                | 0.627    |
| University degree (n %)                   | 24       | 26%            | 6        | 35%            |          |
| Primary or secondary school (n %)         | 68       | 74%            | 11       | 65%            |          |
| <i>Age (y)</i>                            | 92       | 10.0 (1.1)     | 17       | 10.1 (1.2)     | 0.871    |
| <i>Peak height velocity (y)</i>           | 92       | -2.3 (1.0)     | 17       | -2.2 (1.0)     | 0.635    |
| <i>Body mass index (kg/m<sup>2</sup>)</i> | 92       | 26.7 (3.6)     | 17       | 27.3 (3.7)     | 0.523    |
| <i>Body mass index (WHO z-score)</i>      | 92       | 3.0 (0.9)      | 17       | 3.1 (0.9)      | 0.857    |
| <i>Fat mass index (kg/m<sup>2</sup>)</i>  | 92       | 11.7 (2.8)     | 17       | 12.5 (3.6)     | 0.397    |

**eTable 3.** Effects of the ActiveBrains Exercise Program on Cardiometabolic Health (Per-Protocol Analyses)

|                                       | Mean (95% CI)    |    | N  | Control group*          | Difference between groups | P    |
|---------------------------------------|------------------|----|----|-------------------------|---------------------------|------|
|                                       | N <sub>all</sub> | N  |    |                         |                           |      |
| LDL cholesterol (mg/dL)               | 71               | 38 | 33 |                         |                           |      |
| Raw score                             |                  |    |    | 97.3 (91.95 to 102.64)  | -6.95 (-14.27 to 0.37)    | 0.06 |
| Z-Score                               |                  |    |    | -0.42 (-0.62 to -0.22)  | -0.14 (-0.36 to 0.08)     |      |
| HDL cholesterol (mg/dL) <sup>†</sup>  | 79               | 42 | 37 |                         |                           |      |
| Raw score                             |                  |    |    | 49.08 (46.33 to 51.83)  | 2.49 (-1.3 to 6.27)       | 0.19 |
| Z-Score                               |                  |    |    | 0.04 (-0.2 to 0.27)     | -0.19 (-0.44 to 0.06)     |      |
| Triglycerides (mg/dL)                 | 86               | 44 | 42 |                         |                           |      |
| Raw score                             |                  |    |    | 97.63 (87.21 to 108.05) | -3.48 (-18.06 to 11.09)   | 0.63 |
| Z-Score                               |                  |    |    | -0.05 (-0.27 to 0.17)   | 0.03 (-0.2 to 0.26)       |      |
| TG-to-HDL ratio (mg/dL)               | 78               | 41 | 37 |                         |                           |      |
| Raw score                             |                  |    |    | 2.12 (1.82 to 2.42)     | -0.24 (-0.65 to 0.18)     | 0.26 |
| Z-Score                               |                  |    |    | -0.16 (-0.33 to 0.02)   | -0.01 (-0.2 to 0.17)      |      |
| Insulin (μU/ml)                       | 76               | 39 | 37 |                         |                           |      |
| Raw score                             |                  |    |    | 13.36 (11.31 to 15.41)  | -0.55 (-3.49 to 2.39)     | 0.71 |
| Z-Score                               |                  |    |    | -0.01 (-0.25 to 0.22)   | 0.05 (-0.19 to 0.29)      |      |
| Glucose (mg/dL)                       | 88               | 46 | 42 |                         |                           |      |
| Raw score                             |                  |    |    | 83.98 (81.59 to 86.38)  | 0.23 (-3.29 to 3.75)      | 0.89 |
| Z-Score                               |                  |    |    | -0.33 (-0.67 to 0.02)   | -0.36 (-0.72 to 0)        |      |
| HOMA                                  | 75               | 39 | 36 |                         |                           |      |
| Raw score                             |                  |    |    | 2.81 (2.3 to 3.32)      | -0.12 (-0.86 to 0.61)     | 0.74 |
| Z-Score                               |                  |    |    | -0.04 (-0.3 to 0.22)    | 0.02 (-0.25 to 0.29)      |      |
| Systolic and diastolic average (mmHG) | 87               | 46 | 41 |                         |                           |      |
| Raw score                             |                  |    |    | 78.01 (75.76 to 80.26)  | -1.86 (-5.14 to 1.42)     | 0.26 |
| Z-Score                               |                  |    |    | -0.05 (-0.23 to 0.14)   | 0.11 (-0.09 to 0.3)       |      |
| MAP (mmHG)                            | 87               | 46 | 41 |                         |                           |      |
| Raw score                             |                  |    |    | 70.1 (67.93 to 72.27)   | -1.22 (-4.38 to 1.95)     | 0.44 |
| Z-Score                               |                  |    |    | -0.1 (-0.28 to 0.08)    | 0 (-0.19 to 0.19)         |      |
| Body mass index (kg/m <sup>2</sup> )  | 92               | 47 | 45 |                         |                           |      |
| Raw score                             |                  |    |    | 26.34 (26.02 to 26.67)  | -0.59 (-1.06 to -0.12)    | 0.01 |
| Z-Score                               |                  |    |    | -0.13 (-0.23 to -0.04)  | 0.03 (-0.06 to 0.12)      |      |
| WHO z-Score                           |                  |    |    | -0.69 (-0.75 to -0.63)  | -0.59 (-0.65 to -0.53)    | 0.02 |

|                                      |    |    |                           |    |                           |                          |       |
|--------------------------------------|----|----|---------------------------|----|---------------------------|--------------------------|-------|
| Fat mass index (kg/m <sup>2</sup> )  | 92 | 47 |                           | 45 |                           |                          |       |
| Raw score                            |    |    | 10.75 (10.52 to 10.99)    |    | 11.42 (11.18 to 11.66)    | -0.67 (-1.01 to -0.33)   |       |
| Z-Score                              |    |    | -0.37 (-0.46 to -0.28)    |    | -0.1 (-0.2 to -0.01)      | -0.27 (-0.4 to -0.14)    | 0.001 |
| Lean mass index (kg/m <sup>2</sup> ) | 92 | 47 |                           | 45 |                           |                          |       |
| Raw score                            |    |    | 13.58 (13.38 to 13.79)    |    | 13.54 (13.33 to 13.75)    | 0.05 (-0.25 to 0.34)     |       |
| Z-Score                              |    |    | -0.24 (-0.38 to -0.1)     |    | -0.27 (-0.41 to -0.13)    | 0.03 (-0.17 to 0.23)     | 0.75  |
| Waist circumference (cm)             | 92 | 47 |                           | 45 |                           |                          |       |
| Raw score                            |    |    | 91.85 (90.75 to 92.95)    |    | 93.02 (91.89 to 94.14)    | -1.17 (-2.74 to 0.41)    |       |
| Z-Score                              |    |    | 0.14 (0.03 to 0.25)       |    | 0.26 (0.14 to 0.37)       | -0.12 (-0.28 to 0.04)    | 0.14  |
| Visceral adipose tissue (g)          | 77 | 38 |                           | 39 |                           |                          |       |
| Raw score                            |    |    | 394.66 (375.13 to 414.19) |    | 426.1 (406.83 to 445.38)  | -31.44 (-58.99 to -3.9)  |       |
| Z-Score                              |    |    | -0.07 (-0.24 to 0.11)     |    | 0.21 (0.04 to 0.38)       | -0.28 (-0.52 to -0.03)   | 0.02  |
| CRF performance (laps)               | 89 | 46 |                           | 43 |                           |                          |       |
| Raw score                            |    |    | 18.85 (17.1 to 20.6)      |    | 16.09 (14.28 to 17.9)     | 2.75 (0.22 to 5.28)      |       |
| Z-Score                              |    |    | 0.46 (0.22 to 0.71)       |    | 0.08 (-0.18 to 0.33)      | 0.39 (0.03 to 0.74)      | 0.03  |
| CRF VO <sub>2</sub> max (ml/kg/min)  | 89 | 46 |                           | 43 |                           |                          |       |
| Raw score                            |    |    | 40.78 (40.16 to 41.4)     |    | 39.84 (39.2 to 40.48)     | 0.94 (0.05 to 1.84)      |       |
| Z-Score                              |    |    | 0.08 (-0.16 to 0.31)      |    | -0.28 (-0.52 to -0.03)    | 0.35 (0.02 to 0.69)      | 0.03  |
| Speed-agility fitness (sec)‡         | 89 | 46 |                           | 43 |                           |                          |       |
| Raw score                            |    |    | 14.84 (14.59 to 15.08)    |    | 14.96 (14.71 to 15.21)    | -0.13 (-0.48 to 0.22)    |       |
| Z-Score                              |    |    | -0.18 (-0.33 to -0.02)    |    | -0.1 (-0.26 to 0.06)      | -0.08 (-0.3 to 0.14)     | 0.46  |
| Upper-limb muscular strength (kg)    | 90 | 47 |                           | 43 |                           |                          |       |
| Raw score                            |    |    | 17.45 (16.93 to 17.97)    |    | 17.98 (17.43 to 18.53)    | -0.53 (-1.29 to 0.23)    |       |
| Z-Score                              |    |    | 0.13 (0.01 to 0.26)       |    | 0.26 (0.13 to 0.39)       | -0.12 (-0.3 to 0.05)     | 0.17  |
| Lower-limb muscular strength (cm)    | 90 | 47 |                           | 43 |                           |                          |       |
| Raw score                            |    |    | 106.45 (103.14 to 109.77) |    | 109.27 (105.81 to 112.74) | -2.82 (-7.64 to 2)       |       |
| Z-Score                              |    |    | 0.11 (-0.07 to 0.3)       |    | 0.27 (0.08 to 0.46)       | -0.16 (-0.42 to 0.11)    | 0.24  |
| Cardiometabolic risk score 1**       | 75 | 41 | -0.163 (-0.405 to 0.079)  | 43 | 0.196 (-0.069 to 0.462)   | -0.359 (-0.719 to 0.001) | 0.05  |
| Cardiometabolic risk score 2††       | 75 | 41 | -0.172 (-0.412 to 0.068)  | 43 | 0.208 (-0.056 to 0.472)   | -0.38 (-0.738 to -0.021) | 0.03  |

Data analyses were primarily conducted under the per-protocol principle, i.e., attending 70% of the sessions.

Z-Score values indicate how many standard deviations have the follow-up values changed with respect to the baseline mean and standard deviation. E.g., a 0.50 Z-Score means that the mean value at follow-up is 0.50 standard deviations higher than the mean value at baseline indicating a positive change with negative values indicating the opposite.

\*Adjusted for baseline values.

†Higher values indicate better health.

‡Higher values indicate lower performance.

\*\*Cardiometabolic risk score 1 was calculated as the age- and sex-normalized scores for HDL cholesterol, waist circumference, triglycerides, glucose, and the average of systolic and diastolic blood pressure based on European population reference values.

††Cardiometabolic risk score 2 additionally included the CRF.

TG: triglyceride; LDL: low density lipoprotein; HDL: high lipoprotein consumption; MAP: mean arterial pressure; CRF: cardiorespiratory fitness; VO<sub>2</sub>max: maximum oxygen consumption.

**eTable 4.** Effects of the ActiveBrains Exercise Program on Cardiometabolic Health (Intention-to-Treat Analyses)

|                                       | Mean (95% CI)    |    | N                          | Control group*            | Difference between groups | P    |
|---------------------------------------|------------------|----|----------------------------|---------------------------|---------------------------|------|
|                                       | N <sub>all</sub> | N  |                            |                           |                           |      |
| LDL cholesterol (mg/dL)               | 109              | 57 | 52                         |                           |                           |      |
| Raw score                             |                  |    | 92.914 (88.739 to 97.089)  | 94.69 (90.319 to 99.062)  | -1.776 (-7.829 to 4.276)  | 0.56 |
| Z-Score                               |                  |    | -0.32 (-0.487 to -0.153)   | -0.249 (-0.424 to -0.074) | -0.071 (-0.313 to 0.171)  |      |
| HDL cholesterol (mg/dl)†              | 109              | 57 | 52                         |                           |                           |      |
| Raw score                             |                  |    | 51.981 (49.862 to 54.1)    | 49.198 (46.979 to 51.417) | 2.783 (-0.291 to 5.857)   | 0.03 |
| Z-Score                               |                  |    | 0.132 (-0.066 to 0.33)     | -0.128 (-0.335 to 0.079)  | 0.26 (-0.027 to 0.547)    |      |
| Triglycerides (mg/dl)                 | 109              | 57 | 52                         |                           |                           |      |
| Raw score                             |                  |    | 94.085 (85.467 to 102.703) | 97.81 (88.786 to 106.835) | -3.725 (-16.225 to 8.775) | 0.55 |
| Z-Score                               |                  |    | -0.043 (-0.234 to 0.149)   | 0.04 (-0.161 to 0.24)     | -0.083 (-0.361 to 0.195)  |      |
| TG-to-HDL ratio (mg/dl)               | 109              | 57 | 52                         |                           |                           |      |
| Raw score                             |                  |    | 1.934 (1.707 to 2.16)      | 2.124 (1.887 to 2.361)    | -0.19 (-0.519 to 0.138)   | 0.25 |
| Z-Score                               |                  |    | -0.122 (-0.267 to 0.023)   | 0 (-0.152 to 0.151)       | -0.122 (-0.332 to 0.088)  |      |
| Insulin (μU/ml)                       | 109              | 57 | 52                         |                           |                           |      |
| Raw score                             |                  |    | 13.147 (11.681 to 14.614)  | 13.669 (12.133 to 15.204) | -0.522 (-2.645 to 1.602)  | 0.62 |
| Z-Score                               |                  |    | -0.037 (-0.217 to 0.142)   | 0.026 (-0.161 to 0.214)   | -0.064 (-0.323 to 0.196)  |      |
| Glucose (mg/dl)                       | 109              | 57 | 52                         |                           |                           |      |
| Raw score                             |                  |    | 84.597 (82.539 to 86.656)  | 84.041 (81.883 to 86.199) | 0.556 (-2.469 to 3.582)   | 0.71 |
| Z-Score                               |                  |    | -0.283 (-0.592 to 0.025)   | -0.367 (-0.69 to -0.043)  | 0.083 (-0.37 to 0.537)    |      |
| HOMA                                  | 109              | 57 | 52                         |                           |                           |      |
| Raw score                             |                  |    | 2.803 (2.442 to 3.164)     | 2.894 (2.516 to 3.272)    | -0.091 (-0.614 to 0.431)  | 0.72 |
| Z-Score                               |                  |    | -0.048 (-0.243 to 0.147)   | 0.002 (-0.203 to 0.206)   | -0.049 (-0.332 to 0.233)  |      |
| Systolic and diastolic average (mmHG) | 109              | 57 | 52                         |                           |                           |      |
| Raw score                             |                  |    | 78.229 (76.37 to 80.089)   | 79.859 (77.912 to 81.807) | -1.63 (-4.326 to 1.066)   | 0.23 |
| Z-Score                               |                  |    | -0.084 (-0.236 to 0.067)   | 0.048 (-0.11 to 0.207)    | -0.133 (-0.352 to 0.087)  |      |
| MAP (mmHG)                            | 109              | 57 | 52                         |                           |                           |      |
| Raw score                             |                  |    | 70.356 (68.535 to 72.177)  | 71.521 (69.614 to 73.428) | -1.164 (-3.804 to 1.476)  | 0.38 |
| Z-Score                               |                  |    | -0.132 (-0.277 to 0.013)   | -0.039 (-0.191 to 0.112)  | -0.093 (-0.302 to 0.117)  |      |
| Body mass index (kg/m <sup>2</sup> )  | 109              | 57 | 52                         |                           |                           |      |
| Raw score                             |                  |    | 26.585 (26.27 to 26.899)   | 26.903 (26.574 to 27.232) | -0.319 (-0.776 to 0.139)  | 0.17 |
| Z-Score                               |                  |    | -0.062 (-0.149 to 0.025)   | 0.026 (-0.065 to 0.117)   | -0.088 (-0.214 to 0.038)  |      |
| WHO z-Score                           |                  |    | -0.605 (-0.665 to -0.545)  | -0.556 (-0.618 to -0.493) | -0.049 (-0.136 to 0.037)  | 0.26 |
| Fat mass index (kg/m <sup>2</sup> )   | 109              | 57 | 52                         |                           |                           |      |

|                                      |     |    |                             |    |                              |                            |      |
|--------------------------------------|-----|----|-----------------------------|----|------------------------------|----------------------------|------|
| Raw score                            |     |    | 13.578 (13.375 to 13.782)   |    | 13.66 (13.447 to 13.873)     | -0.082 (-0.376 to 0.213)   |      |
| Z-Score                              |     |    | -0.274 (-0.414 to -0.134)   |    | -0.218 (-0.365 to -0.071)    | -0.056 (-0.259 to 0.147)   | 0.01 |
| Lean mass index (kg/m <sup>2</sup> ) | 109 | 57 |                             | 52 |                              |                            |      |
| Raw score                            |     |    | 92.124 (91.128 to 93.119)   |    | 92.78 (91.738 to 93.822)     | -0.656 (-2.098 to 0.785)   |      |
| Z-Score                              |     |    | 0.194 (0.094 to 0.295)      |    | 0.261 (0.155 to 0.366)       | -0.066 (-0.212 to 0.079)   | 0.58 |
| Waist circumference (cm)             | 109 | 57 |                             | 52 |                              |                            |      |
| Raw score                            |     |    | 397.313 (381.94 to 412.686) |    | 417.309 (401.213 to 433.406) | -19.996 (-42.274 to 2.282) |      |
| Z-Score                              |     |    | -0.02 (-0.168 to 0.128)     |    | 0.172 (0.017 to 0.327)       | -0.193 (-0.407 to 0.022)   | 0.36 |
| Visceral adipose tissue (g)          | 109 | 57 |                             | 52 |                              |                            |      |
| Raw score                            |     |    | 19.269 (17.434 to 21.103)   |    | 17.928 (16.008 to 19.849)    | 1.34 (-1.315 to 3.996)     |      |
| Z-Score                              |     |    | 0.424 (0.185 to 0.662)      |    | 0.249 (-0.001 to 0.499)      | 0.174 (-0.171 to 0.52)     | 0.07 |
| CRF performance (laps)               | 109 | 57 |                             | 52 |                              |                            |      |
| Raw score                            |     |    | 40.943 (40.34 to 41.545)    |    | 40.277 (39.646 to 40.908)    | 0.666 (-0.206 to 1.539)    |      |
| Z-Score                              |     |    | 0.086 (-0.137 to 0.309)     |    | -0.161 (-0.394 to 0.073)     | 0.247 (-0.076 to 0.57)     | 0.31 |
| CRF VO <sub>2</sub> max (ml/kg/min)  | 109 | 57 |                             | 52 |                              |                            |      |
| Raw score                            |     |    | 14.787 (14.552 to 15.023)   |    | 14.849 (14.602 to 15.095)    | -0.061 (-0.403 to 0.28)    |      |
| Z-Score                              |     |    | -0.207 (-0.357 to -0.057)   |    | -0.168 (-0.325 to -0.01)     | -0.039 (-0.257 to 0.179)   | 0.13 |
| Speed-agility (sec)‡                 | 109 | 57 |                             | 52 |                              |                            |      |
| Raw score                            |     |    | 17.641 (17.155 to 18.127)   |    | 18.026 (17.517 to 18.535)    | -0.384 (-1.089 to 0.32)    |      |
| Z-Score                              |     |    | 0.193 (0.076 to 0.31)       |    | 0.286 (0.163 to 0.408)       | -0.093 (-0.262 to 0.077)   | 0.72 |
| Upper-limb muscular strength (kg)    | 109 | 57 |                             | 52 |                              |                            |      |
| Raw score                            |     |    | 107.434 (104.459 to 110.41) |    | 108.789 (105.673 to 111.905) | -1.355 (-5.669 to 2.959)   |      |
| Z-Score                              |     |    | 0.129 (-0.034 to 0.292)     |    | 0.204 (0.033 to 0.374)       | -0.074 (-0.311 to 0.162)   | 0.28 |
| Lower-limb muscular strength (cm)    | 109 | 57 |                             | 52 |                              |                            |      |
| Raw score                            |     |    | -0.118 (-0.324 to 0.089)    |    | 0.129 (-0.087 to 0.345)      | -0.247 (-0.546 to 0.053)   |      |
| Z-Score                              |     |    | -0.121 (-0.325 to 0.083)    |    | 0.133 (-0.081 to 0.346)      | -0.254 (-0.55 to 0.042)    | 0.53 |
| Cardiometabolic risk score 1**       | 109 | 57 | 13.578 (13.375 to 13.782)   | 52 | 13.66 (13.447 to 13.873)     | -0.082 (-0.376 to 0.213)   | 0.10 |
| Cardiometabolic risk score 2††       | 109 | 57 | -0.274 (-0.414 to -0.134)   | 52 | -0.218 (-0.365 to -0.071)    | -0.056 (-0.259 to 0.147)   | 0.09 |

Data analyses were conducted under the intention-to-treat principle, i.e., including all participants and imputing the missing data using predictive mean matching multiple imputations. Z-score values indicate how many standard deviations have the follow-up values changed with respect to the baseline mean and standard deviation. E.g., a 0.50 Z-score means that the mean value at follow-up is 0.50 standard deviations higher than the mean value at baseline indicating a positive change with negative values indicating the opposite.

\*Adjusted for baseline values.



†Higher values indicate better health.

‡Higher values indicate lower performance

\*\*Cardiometabolic risk score 1 was calculated as the age- and sex-normalized scores for HDL cholesterol, waist circumference, triglycerides, glucose, and the average of systolic and diastolic blood pressure based on European population reference values.

††Cardiometabolic risk score 2 additionally included the CRF.

TG: triglyceride; LDL: low density lipoprotein; HDL: high lipoprotein consumption; MAP: mean arterial pressure; CRF: cardiorespiratory fitness; VO<sub>2</sub>max: maximum oxygen consumption.

**eTable 5.** Effects of the ActiveBrains Exercise Program on Mental Health (Per-Protocol Analyses)

|                                 | Mean (95% CI)    |    | N  | Control group*            | Difference between groups | P    |
|---------------------------------|------------------|----|----|---------------------------|---------------------------|------|
|                                 | N <sub>all</sub> | N  |    |                           |                           |      |
| <i>Psychological ill-being†</i> |                  |    |    |                           |                           |      |
| Stress                          | 88               | 46 | 42 |                           |                           |      |
| Raw score                       |                  |    |    | 5.05 (4.22 to 5.88)       | 0.12 (-1.04 to 1.27)      | 0.84 |
| Z-Score                         |                  |    |    | -0.24 (-0.49 to 0.02)     | 0.04 (-0.32 to 0.39)      |      |
| Anxiety                         | 84               | 45 | 39 |                           |                           |      |
| Raw score                       |                  |    |    | 30.21 (28.19 to 32.23)    | 1.83 (-0.93 to 4.59)      | 0.19 |
| Z-Score                         |                  |    |    | -0.46 (-0.74 to -0.18)    | 0.25 (-0.13 to 0.63)      |      |
| Depression                      | 88               | 44 | 44 |                           |                           |      |
| Raw score                       |                  |    |    | 7.31 (5.91 to 8.7)        | 0 (-1.98 to 1.98)         | 0.99 |
| Z-Score                         |                  |    |    | -0.21 (-0.49 to 0.06)     | 0 (-0.39 to 0.39)         |      |
| Negative affect                 | 80               | 44 | 36 |                           |                           |      |
| Raw score                       |                  |    |    | 16.16 (15.02 to 17.31)    | -0.45 (-2 to 1.1)         | 0.56 |
| Z-Score                         |                  |    |    | 0.04 (-0.29 to 0.36)      | -0.13 (-0.57 to 0.31)     |      |
| Composite score                 | 73               | 39 | 34 | -0.07 (-0.28 to 0.15)     | 0.14 (-0.15 to 0.43)      | 0.34 |
| <i>Psychological well-being</i> |                  |    |    |                           |                           |      |
| Positive affect                 | 81               | 44 | 37 |                           |                           |      |
| Raw score                       |                  |    |    | 24.94 (23.91 to 25.98)    | -0.01 (-1.42 to 1.39)     | 0.95 |
| Z-Score                         |                  |    |    | 0.18 (-0.17 to 0.53)      | 0 (-0.48 to 0.47)         |      |
| Happiness                       | 92               | 47 | 45 |                           |                           |      |
| Raw score                       |                  |    |    | 23.6 (22.56 to 24.63)     | -0.81 (-2.26 to 0.64)     | 0.30 |
| Z-Score                         |                  |    |    | 0.22 (-0.04 to 0.48)      | -0.21 (-0.58 to 0.16)     |      |
| Optimism                        | 87               | 46 | 41 |                           |                           |      |
| Raw score                       |                  |    |    | 22.32 (21.14 to 23.51)    | 0.24 (-1.39 to 1.86)      | 0.64 |
| Z-Score                         |                  |    |    | 0.07 (-0.22 to 0.37)      | 0.06 (-0.34 to 0.46)      |      |
| Self-efficacy                   | 90               | 47 | 43 |                           |                           |      |
| Raw score                       |                  |    |    | 31.61 (30.2 to 33.03)     | -0.56 (-2.52 to 1.4)      | 0.65 |
| Z-Score                         |                  |    |    | 0.15 (-0.13 to 0.44)      | -0.11 (-0.51 to 0.29)     |      |
| Self-concept                    | 79               | 43 | 36 |                           |                           |      |
| Raw score                       |                  |    |    | 223.15 (214.12 to 232.17) | -3.62 (-15.86 to 8.62)    | 0.55 |
| Z-Score                         |                  |    |    | -0.14 (-0.45 to 0.18)     | -0.13 (-0.55 to 0.3)      |      |
| Self-esteem                     | 87               | 47 | 40 |                           |                           |      |
| Raw score                       |                  |    |    | 34.8 (33.52 to 36.08)     | 0.37 (-1.37 to 2.11)      | 0.60 |

|                            |    |    |                       |    |                      |                       |      |
|----------------------------|----|----|-----------------------|----|----------------------|-----------------------|------|
| Z-Score                    |    |    | 0.47 (0.22 to 0.72)   |    | 0.39 (0.12 to 0.66)  | 0.08 (-0.29 to 0.45)  |      |
| Composite score            | 72 | 41 | -0.05 (-0.3 to 0.2)   | 31 | 0.08 (-0.21 to 0.36) | -0.13 (-0.51 to 0.25) | 0.50 |
| <i>Total mental health</i> |    |    |                       |    |                      |                       |      |
| Composite score            | 64 | 36 | -0.12 (-0.36 to 0.12) | 28 | 0.11 (-0.16 to 0.39) | -0.24 (-0.6 to 0.13)  | 0.20 |

Data analyses were primarily conducted under the per-protocol principle, i.e., attending 70% of the sessions. Z-score values indicate how many standard deviations have the follow-up values changed with respect to the baseline mean and standard deviation. E.g., a 0.50 Z-score means that the mean value at follow-up is 0.50 standard deviations higher than the mean value at baseline, indicating a positive change with negative values indicating the opposite.

\*Adjusted for baseline values.

†Higher values indicate lower mental health.

**eTable 6.** Effects of the ActiveBrains Exercise Program on Mental Health (Intention-to-Treat Analyses)

|                                 | Mean (95% CI)    |    | N                        | Control group*            | Difference between groups | P    |
|---------------------------------|------------------|----|--------------------------|---------------------------|---------------------------|------|
|                                 | N <sub>all</sub> | N  |                          |                           |                           |      |
| <i>Psychological ill-being†</i> |                  |    |                          |                           |                           |      |
| Stress                          | 109              | 57 |                          | 52                        |                           |      |
| Raw score                       |                  |    | 5.24 (4.49 to 5.98)      | 5.13 (4.34 to 5.92)       | 0.11 (-0.98 to 1.20)      | 0.84 |
| Z-Score                         |                  |    | -0.16 (-0.4 to 0.08)     | -0.19 (-0.45 to 0.06)     | 0.03 (-0.32 to 0.39)      |      |
| Anxiety                         | 109              | 57 |                          | 52                        |                           |      |
| Raw score                       |                  |    | 32.11 (30.53 to 33.68)   | 30.94 (29.27 to 32.61)    | 1.17 (-1.13 to 3.46)      | 0.31 |
| Z-Score                         |                  |    | -0.2 (-0.41 to 0.02)     | -0.36 (-0.59 to -0.13)    | 0.16 (-0.16 to 0.48)      |      |
| Depression                      | 109              | 57 |                          | 52                        |                           |      |
| Raw score                       |                  |    | 7.42 (6.19 to 8.66)      | 7.8 (6.49 to 9.1)         | -0.37 (-2.18 to 1.43)     | 0.68 |
| Z-Score                         |                  |    | -0.19 (-0.42 to 0.05)    | -0.12 (-0.37 to 0.13)     | -0.07 (-0.41 to 0.27)     |      |
| Negative affect                 | 109              | 57 |                          | 52                        |                           |      |
| Raw score                       |                  |    | 15.72 (14.87 to 16.58)   | 16.33 (15.42 to 17.23)    | -0.61 (-1.85 to 0.64)     | 0.33 |
| Z-Score                         |                  |    | -0.14 (-0.39 to 0.12)    | 0.04 (-0.23 to 0.31)      | -0.18 (-0.55 to 0.19)     |      |
| Composite score                 | 109              | 57 | -0.02 (-0.22 to 0.18)    | 0.02 (-0.19 to 0.23)      | -0.03 (-0.33 to 0.26)     | 0.81 |
| <i>Psychological well-being</i> |                  |    |                          |                           |                           |      |
| Positive affect                 | 109              | 57 |                          | 52                        |                           |      |
| Raw score                       |                  |    | 24.71 (23.83 to 25.59)   | 24.7 (23.77 to 25.63)     | 0.01 (-1.27 to 1.29)      | 0.98 |
| Z-Score                         |                  |    | 0.09 (-0.21 to 0.38)     | 0.08 (-0.23 to 0.39)      | 0 (-0.42 to 0.43)         |      |
| Happiness                       | 109              | 57 |                          | 52                        |                           |      |
| Raw score                       |                  |    | 23.01 (22.1 to 23.92)    | 23.1 (22.14 to 24.06)     | -0.09 (-1.42 to 1.24)     | 0.89 |
| Z-Score                         |                  |    | 0.07 (-0.16 to 0.29)     | 0.09 (-0.15 to 0.33)      | -0.02 (-0.36 to 0.31)     |      |
| Optimism                        | 109              | 57 |                          | 52                        |                           |      |
| Raw score                       |                  |    | 22.73 (21.73 to 23.74)   | 21.9 (20.83 to 22.97)     | 0.83 (-0.63 to 2.30)      | 0.26 |
| Z-Score                         |                  |    | 0.21 (-0.05 to 0.46)     | -0.01 (-0.28 to 0.27)     | 0.21 (-0.16 to 0.58)      |      |
| Self-efficacy                   | 109              | 57 |                          | 52                        |                           |      |
| Raw score                       |                  |    | 31.47 (30.29 to 32.64)   | 31.62 (30.38 to 32.87)    | -0.16 (-1.88 to 1.56)     | 0.85 |
| Z-Score                         |                  |    | 0.11 (-0.13 to 0.36)     | 0.15 (-0.11 to 0.41)      | -0.03 (-0.39 to 0.33)     |      |
| Self-concept                    | 109              | 57 |                          | 52                        |                           |      |
| Raw score                       |                  |    | 224.4 (218.94 to 229.86) | 221.92 (216.14 to 227.69) | 2.48 (-5.48 to 10.44)     | 0.53 |
| Z-Score                         |                  |    | -0.07 (-0.26 to 0.12)    | -0.16 (-0.36 to 0.04)     | 0.09 (-0.19 to 0.36)      |      |
| Self-esteem                     | 109              | 57 |                          | 52                        |                           |      |
| Raw score                       |                  |    | 35.14 (34.03 to 36.25)   | 34.15 (32.98 to 35.32)    | 0.99 (-0.63 to 2.61)      | 0.22 |

|                            |     |    |                      |    |                       |                      |      |
|----------------------------|-----|----|----------------------|----|-----------------------|----------------------|------|
| Z-Score                    |     |    | 0.46 (0.22 to 0.69)  |    | 0.25 (-0.002 to 0.50) | 0.21 (-0.13 to 0.55) |      |
| Composite score            | 109 | 57 | 0.04 (-0.19 to 0.26) | 52 | -0.04 (-0.27 to 0.2)  | 0.07 (-0.25 to 0.4)  | 0.65 |
| <i>Total mental health</i> |     |    |                      |    |                       |                      |      |
| Composite score            | 109 | 57 | 0.02 (-0.19 to 0.23) | 52 | -0.02 (-0.24 to 0.2)  | 0.04 (-0.27 to 0.34) | 0.81 |

Data analyses were conducted under the intention-to-treat principle, i.e., including all participants and imputing the missing data using predictive mean matching multiple imputations. Z-score values indicate how many standard deviations have the follow-up values changed with respect to the baseline mean and standard deviation. E.g., a 0.50 Z-score means that the mean value at follow-up is 0.50 standard deviations higher than the mean value at baseline indicating a positive change, with negative values indicating the opposite.

\*Adjusted for baseline values.

†Higher values indicate lower mental health.

**eFigure 1.** Individual Change Distribution in the Cardiometabolic Risk Scores, Visceral Adipose Tissue, and Body Mass Index Affected by the Exercise Program

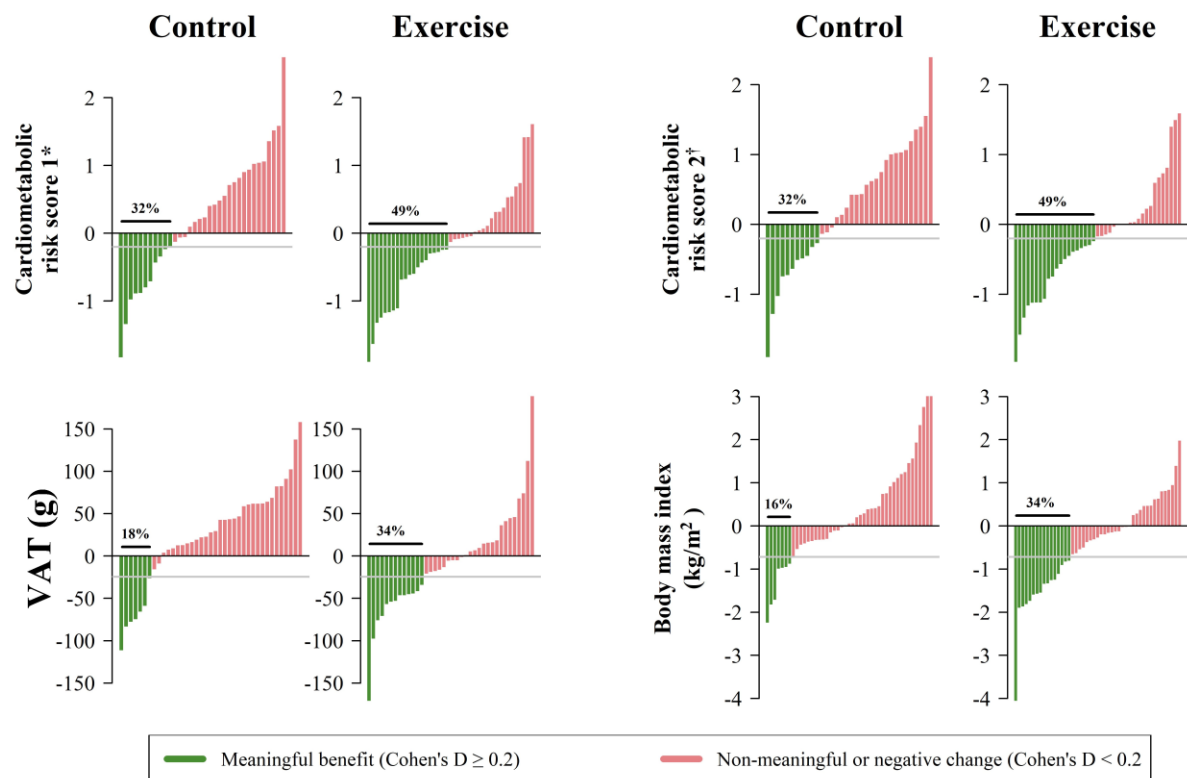

Data analyses were primarily conducted under the per-protocol principle, i.e., attending  $\geq$  70% of the sessions.

\*Cardiometabolic risk score 1 was calculated as the age- and sex-normalized scores for HDL cholesterol, waist circumference, triglycerides, glucose, and the average of systolic and diastolic blood pressure based on European population reference values.<sup>39</sup>

†Cardiometabolic risk score 2 additionally included the CRF.

VAT: visceral adipose tissue.

**eFigure 2.** Change in Daily Activity Composition Induced by the Exercise Program as Measured With Hip- and Wrist-Worn Accelerometers

**A) Hip-worn accelerometer**

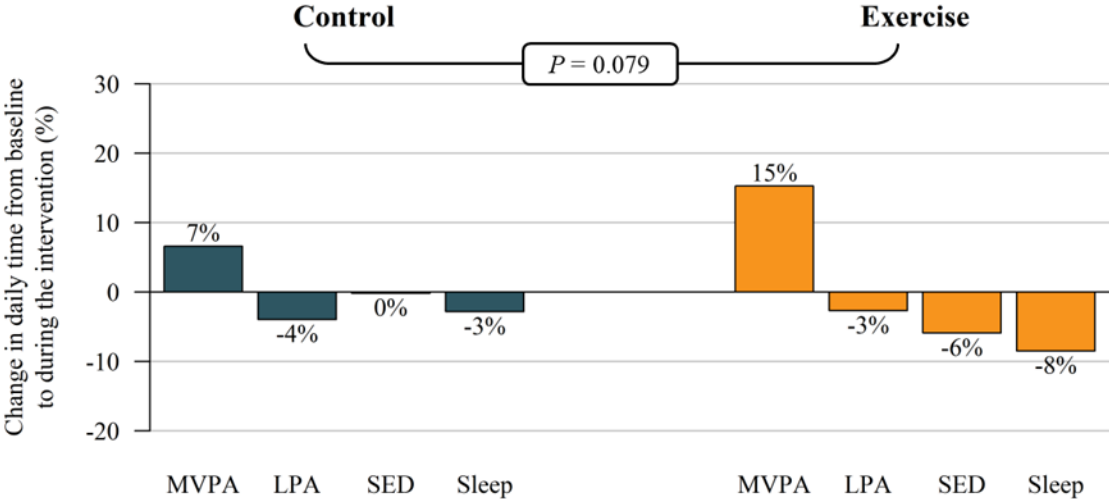

**B) Wrist-worn accelerometer**

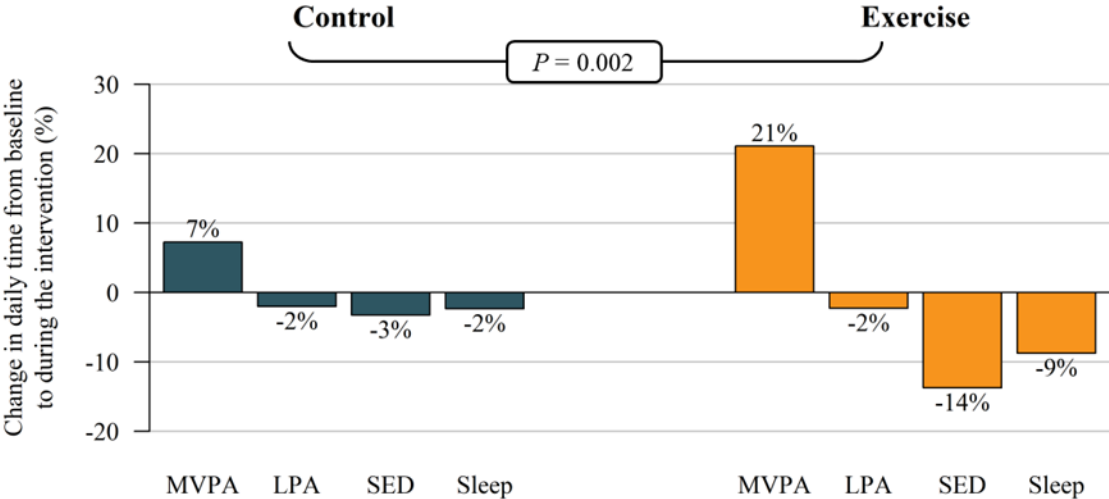

Data analyses were primarily conducted under the per-protocol principle, i.e., attending 70% of the sessions. Isometric log-ratios between each group’s compositional mean and the overall compositional mean after centering the data at baseline and during exercise were calculated. *P* value from Hotelling’s T-squared test for pair-wise comparison of multivariate means. MVPA: moderate-to-vigorous physical activity; LPA: light physical activity; SED: sedentary time.
