# Supplementary material for: Effects of an Exercise Program on Cardiometabolic and Mental Health in Children With Overweight or Obesity: A Secondary Analysis of a Randomized Clinical Trial
Source: PubMed Central journal article supplement (PMC10375312; doi:10.1001/jamanetworkopen.2023.24839), 2023-07-27
Supplement: jamanetwopen-e2324839-s003.pdf [file jamanetwopen-e2324839-s003.pdf]

## Data Sharing Statement

Migueles. Effects of an Exercise Program on Cardiometabolic and Mental Health in Children With Overweight or Obesity. *JAMA Netw Open*. Published July 27, 2023.  
doi:10.1001/jamanetworkopen.2023.24839

### Data

**Data available:** No
